1 **Evolution of immunity to SARS-CoV-2**

2

3 Adam K. Wheatley<sup>1,2\*</sup>, Jennifer A. Juno<sup>1\*</sup>, Jing J. Wang<sup>3\*</sup>, Kevin J. Selva<sup>1</sup>, Arnold  
4 Reynaldi<sup>4</sup>, Hyon-Xhi Tan<sup>1</sup>, Wen Shi Lee<sup>1</sup>, Kathleen M. Wragg<sup>1</sup>, Hannah G. Kelly<sup>1,2</sup>,  
5 Robyn Esterbauer<sup>1,2</sup>, Samantha K. Davis<sup>1</sup>, Helen E. Kent<sup>1,5</sup>, Francesca L.  
6 Mordant<sup>1</sup>, Timothy E. Schlub<sup>4,6</sup>, David L. Gordon<sup>7</sup>, David S. Khoury<sup>4</sup>, Kanta  
7 Subbarao<sup>1,8</sup>, Deborah Cromer<sup>4</sup>, Tom P. Gordon<sup>3,9</sup>, Amy W. Chung<sup>1</sup>, Miles P.  
8 Davenport<sup>4</sup>, Stephen J. Kent<sup>1,2,5</sup>✉.

9

10 \*AKW, JAJ and JJW contributed equally

11

12

13 <sup>1</sup> Department of Microbiology and Immunology, University of Melbourne, at The  
14 Peter Doherty Institute for Infection and Immunity, Melbourne, Victoria, Australia

15 <sup>2</sup> Australian Research Council Centre for Excellence in Convergent Bio-Nano Science  
16 and Technology, University of Melbourne, Melbourne, Victoria, Australia

17 <sup>3</sup> Department of Immunology and Flinders Proteomics Facility, College of Medicine  
18 and Public Health, Flinders University, Adelaide, South Australia, Australia

19

20 <sup>4</sup> Kirby Institute, University of New South Wales, Kensington, New South Wales,  
21 Australia

22 <sup>5</sup> Melbourne Sexual Health Centre and Department of Infectious Diseases, Alfred  
23 Hospital and Central Clinical School, Monash University, Melbourne, Victoria,  
24 Australia

25 <sup>6</sup> Sydney School of Public Health, Faculty of Medicine and Health, University of  
26 Sydney, Sydney, New South Wales, Australia

27

28 <sup>7</sup> Department of Microbiology and Infectious Diseases, Flinders University and SA  
29 Pathology, Flinders Medical Centre, Adelaide, South Australia, Australia

30

31 <sup>8</sup> WHO Collaborating Centre for Reference and Research on Influenza, The Peter  
32 Doherty Institute for Infection and Immunity, Melbourne, Victoria, Australia

33 <sup>9</sup> Department of Immunology, SA Pathology, Flinders Medical Centre, Adelaide,  
34 South Australia, Australia

35

36 ✉ Corresponding author. Address to Professor Stephen Kent, Department of  
37 Microbiology and Immunology, Doherty Institute, 792 Elizabeth St, Melbourne,  
38 Victoria, Australia 3000. Phone +61 3 8344 9939. Email: [skent@unimelb.edu.au](mailto:skent@unimelb.edu.au)

39

40  
41 The durability of infection-induced SARS-CoV-2 immunity has major implications  
42 for public health mitigation and vaccine development. Animal studies<sup>1,2</sup> and the  
43 scarcity of confirmed re-infection<sup>3</sup> suggests immune protection is likely, although the  
44 durability of this protection is debated. Lasting immunity following acute viral  
45 infection requires maintenance of both serum antibody and antigen-specific memory  
46 B and T lymphocytes and is notoriously pathogen specific, ranging from life-long for  
47 smallpox or measles<sup>4</sup>, to highly transient for common cold coronaviruses (CCC)<sup>5</sup>.  
48 Neutralising antibody responses are a likely correlate of protective immunity and  
49 exclusively recognise the viral spike (S) protein, predominantly targeting the receptor  
50 binding domain (RBD) within the S1 sub-domain<sup>6</sup>. Multiple reports describe waning  
51 of S-specific antibodies in the first 2-3 months following infection<sup>7-12</sup>. However,  
52 extrapolation of early linear trends in decay might be overly pessimistic, with several  
53 groups reporting that serum neutralisation is stable over time in a proportion of  
54 convalescent subjects<sup>8,12-17</sup>. While SARS-CoV-2 specific B and T cell responses are  
55 readily induced by infection<sup>6,13,18-24</sup>, the longitudinal dynamics of these key memory  
56 populations remains poorly resolved. Here we comprehensively profiled antibody, B  
57 and T cell dynamics over time in a cohort recovered from mild-moderate COVID-19.  
58 We find that binding and neutralising antibody responses, together with individual  
59 serum clonotypes, decay over the first 4 months post-infection, as expected, with a  
60 similar decline in S-specific CD4<sup>+</sup> and circulating T follicular helper (cTFH)  
61 frequencies. In contrast, S-specific IgG<sup>+</sup> memory B cells (MBC) consistently  
62 accumulate over time, eventually comprising a significant fraction of circulating  
63 MBC. Modelling of the concomitant immune kinetics predicts maintenance of  
64 serological neutralising activity above a titre of 1:40 in 50% of convalescent subjects  
65 to 74 days, with probable additive protection from B and T cells. Overall, our study

66 suggests SARS-CoV-2 immunity after infection is likely to be transiently protective at  
67 a population level. SARS-CoV-2 vaccines may require greater immunogenicity and  
68 durability than natural infection to drive long-term protection.

69

70 We recruited a longitudinal cohort of 64 subjects who recovered from COVID-19  
71 (Extended Data Fig 1). A total of 158 samples were collected between day 26 and 149  
72 post-symptom onset, with samples nominally denoted as early ( $\leq 50$  days),  
73 intermediate (50-100 days) and late ( $\geq 100$  days) convalescence (Fig 1A). In early  
74 convalescence, neutralisation activity was widespread with a median serological titre  
75 of 52, which declined to 34 in late convalescence (Fig 1B). A mixed-effects  
76 modelling approach found that a two-phase decay model best fit with the observed  
77 decay of neutralisation titres across the cohort ( $p < 0.00001$ , likelihood ratio test), with  
78 rapid decay evident over the first half of our time-series (half-life ( $t_{1/2}$ ) prior to day 70  
79 = 55 days), compared with slower decay in the second half ( $t_{1/2}$  from day 70 = 519  
80 days)(Fig 1B). The capacity of immune plasma to inhibit interaction of the SARS-  
81 CoV-2 receptor binding domain (RBD) with soluble hACE2 receptor<sup>19</sup> waned with a  
82 similar two-phase decay, dropping more rapidly before day 70 ( $t_{1/2} = 238$  days) and  
83 slowing after day 70 ( $t_{1/2} = 1912$  days; Fig 1C).

84

85 Plasma antibodies specific for SARS-CoV-2 S antigens (trimeric spike protein (S),  
86 S1, S2 and RBD subdomains) and nucleocapsid (N) antigens were quantified  
87 longitudinally using a multiplex bead array<sup>25</sup>. In contrast to neutralisation titres, decay  
88 of S-specific IgG was best fit by a model of constant decay over the period of  
89 observation ( $t_{1/2} = 229$  days), with rates of decay divergent for antibodies binding S1  
90 ( $t_{1/2} = 115$  days), S2 ( $t_{1/2} = 344$  days) and RBD antigens ( $t_{1/2} = 126$ ; Fig 1D, Extended

91 Data Fig. 2). Kinetics of decay were broadly consistent between IgG1 and IgG2  
92 subclasses, with IgG3 displaying a more rapid, two phase decline (Extended Data Fig.  
93 2). Consistent with a previous report<sup>26</sup>, we find N-specific IgG decays significantly  
94 more rapidly than S-specific IgG ( $t_{1/2}$  = 71 and 229 days respectively,  $p < 0.00001$ ,  
95 Fig 1D). In contrast to IgG, S-specific IgM and IgA1 fit a two-phase decay, with a  
96 more rapid early decay ( $t_{1/2}$  = 55 and 42 days respectively) followed by a slower  
97 decay in late convalescence ( $t_{1/2}$  = 118 and  $>1000$  days respectively; Fig 1D). A  
98 comparison of decay rates between neutralising activity and antibody binding  
99 demonstrated that early neutralisation decay occurs at a similar rate to the early  
100 decline in S, RBD and S1-specific IgM (Fig 1E, Extended Data Fig 2). Neutralisation  
101 titre at both early and late convalescence was well correlated with serum inhibition of  
102 RBD-ACE2 binding and S, S1 and RBD specific IgG, IgM (and to a lesser extent  
103 IgA1) responses, as well as with S2 and N specific IgG responses (Extended Data Fig  
104 3). Neutralising activity during early convalescence was the best correlate of long-  
105 term maintenance of neutralisation responses (Spearman  $\rho=0.88$ ,  $p<0.00001$ ;  
106 Extended Data Fig 3). Serum inhibition of RBD-ACE2 binding and S1-specific IgG  
107 responses in early infection were also well correlated with neutralisation titre in late  
108 convalescence (Spearman  $\rho=0.79$ ,  $0.81$ , respectively; Extended Data Fig 3).  
109 However, in a multiple regression model, once early neutralisation activity was  
110 included no other significant predictors were identified ( $p>0.15$  for all other  
111 variables).

112  
113 The decay of polyclonal antibody in plasma may obscure a more complex picture of  
114 the dynamics of individual antibody specificities. To resolve longitudinal serological  
115 decay at the level of a single clonotype, we adapted a novel mass spectrometry (MS)-

116 based quantitative proteomics workflow developed for serum autoantibody  
117 profiling<sup>27,28</sup> to track unique CDR-H3 peptides matching recovered S-specific  
118 immunoglobulins sequences from convalescent subjects<sup>19</sup> (n=4; Extended Data Fig  
119 4A, B). Consistent with the decay of polyclonal S-specific antibody in the blood, we  
120 find a decline in the relative abundance over time for each unique clonotype  
121 (Extended Data Fig. 4C), although absolute rates of decay did vary, suggesting the  
122 kinetics might to some degree be clonotype-, epitope- or subject-specific.

123

124 Anti-viral memory B and T cell responses will likely make additive contributions to  
125 long-term immunological protection against COVID-19. SARS-CoV-2-specific B cell  
126 responses were measured longitudinally in 31 subjects where sufficient cells were  
127 available (Fig 1A) using flow cytometry and fluorescent S and RBD probes as  
128 previously described<sup>19</sup>. Following infection, frequencies of IgG+ S-specific memory  
129 B cells increased over time irrespective of disease severity (Fig. 2A and 2B; gating in  
130 Supplementary Fig. S1). In contrast, S-specific IgA+ MBC frequencies remained  
131 relatively stable while IgM+ MBC frequencies decreased (Fig. 2B). IgG+ S-specific  
132 MBC remain significantly elevated at the final relative to the first available sampling  
133 ( $p < 0.0001$ ), contrasting with stable IgA+ ( $p = 0.367$ ) and declining IgM+ populations  
134 ( $p < 0.0001$ ) (Fig. 2C). Assessment of the activation status of S-specific IgG+ MBC  
135 using CD21/CD27 staining<sup>29</sup> demonstrated decreased proportions of “activated” MBC  
136 and a return to a resting (CD27+CD21+) phenotype over time (Extended Data Fig 5).  
137 Although present at comparatively low frequencies, the dynamics of RBD-specific  
138 MBC largely mirrored that of the parental S-specific population (Extended Data Fig  
139 6). Modelling the growth rates reveals IgG+ S-specific MBC frequencies had a  
140 doubling time of 48 days in early convalescence, after which point the doubling time

141 slowed to 843 days, with IgG+ RBD-specific cells MBC broadly comparable  
142 (doubling time = 58 days early,  $t_{1/2}$  = 247 days late) (Extended Data Fig 7). The  
143 consistent and sustained increase in S-specific IgG+ MBC frequencies over time  
144 aligns with a prior report of SARS-CoV-2 convalescent subjects<sup>13</sup>, and with reports  
145 from other viral infections<sup>30</sup> or replicating viral vaccines<sup>31,326</sup>. Given the relatively  
146 low level of somatic mutation observed in S-specific antibodies recovered from  
147 convalescent subjects to date<sup>6,19</sup> comparative studies at 6-9 months post-infection will  
148 be informative to understand the maturation of the humoral response over time and  
149 the protective potential of stably retained MBC populations.

150

151 Anti-viral memory T cell responses have been associated with amelioration of disease  
152 for respiratory infection such as influenza<sup>33</sup>. S-specific cTFH and conventional CD4+  
153 and CD8+ memory T cells (Tmem), were quantified using activation induced marker  
154 (AIM) assays<sup>19,22</sup> (Methods) following stimulation with overlapping S (split into S1  
155 or S2) peptide pools (Fig. 3A, 3B). Frequencies of S-specific memory T cells were  
156 dynamic over time and varied between individuals, with evidence of either rapid  
157 decline or stable maintenance (Fig. 3C). Pairwise comparison of cTFH or CD4+  
158 Tmem frequencies at the final visit relative to the first available sampling  
159 demonstrated a significant reduction in S-specific responses over time ( $p=0.0031$  for  
160 cTFH,  $p=0.0224$  for CD4+ Tmem; Fig. 3D). In contrast, frequencies of S-specific  
161 CD8+ Tmem were stable at a population level ( $p=0.3247$ ), although individual  
162 responses were varied (Fig. 3D). Modelling of the decay rates estimated  $t_{1/2}$  of 128  
163 days for cTFH (95% CI 67, 1247) and 119 days for CD4+ Tmem (95% CI 66, 612;  
164 Extended Data Fig 8). In contrast, the estimated decay of CD8+ responses is not  
165 significantly different from 0 ( $t_{1/2}$  = 670 days, 95% CI 97, -136; Extended Data Fig 8).

166 Therefore, while we and others<sup>34,35</sup> find that CD4+ responses are generally higher  
167 during early convalescence, CD8+ T cell responses appear relatively stable during late  
168 convalescence.

169

170 Multiple studies have reported CCC cross-reactive CD4+ T cells in SARS-CoV-2  
171 uninfected subjects, largely recognising epitopes in S2<sup>22,35,36</sup>. To understand the  
172 influence that recall of pre-existing CCC cross-reactive immunity might have on  
173 decay, we contrasted S1 and S2 responses among the CD4+ T cell subsets. For cTFH,  
174 a significant drop in S1 responses was observed over time ( $p=0.0028$ ), while S2  
175 responses were comparably stable but did similarly trend downward ( $p=0.0657$ )  
176 (Extended Data Fig 9A,B). Analogous patterns were observed for the CD4+ Tmem  
177 cells (Extended Data Fig 9C,D). Consequently, S2-specific cTFH and CD4+ Tmem  
178 populations predominated over S1-directed responses ( $p=0.0147$  and  $p=0.0021$   
179 respectively) in late convalescence (Extended Data Fig 9B,D).

180

181 Polyclonal T cell responses to S comprise an array of immunodominant and  
182 subdominant epitopes; we therefore additionally tracked single CD4+ T cell epitopes  
183 in a subset of 9 donors (Extended Data Fig 10A). Strikingly, we observed substantial  
184 inter- and intra-individual variability in longitudinal epitope-specific responses  
185 (Extended Data Fig 10B,C); in some subjects, all epitope-specific responses tracked  
186 similarly while in others distinct epitope-specific responses would vary independently  
187 over time. In most, but not all, cases, peptide responses tracked similarly between the  
188 cTFH and Tmem populations (Extended Data Fig 10C). Overall, some degree of T  
189 cell immunity remains readily detectable in most subjects 4 months after infection,  
190 although longitudinal epitope-specific frequencies were markedly less predictable.

191  
192 Deconvoluting the protective potential of the suite of concomitant immune responses  
193 elicited by SARS-CoV-2 infection is challenging. The general decline of serological  
194 immunity over time (Fig 4A) was similarly observed for most memory immune cell  
195 subsets except for IgG<sup>+</sup> and IgA<sup>+</sup> MBC populations (Fig 4B). Importantly, rates of  
196 immune decay are likely to stabilise over time to levels of homeostatic maintenance<sup>37</sup>,  
197 although this set point is not yet clear for SARS-CoV-2. Neutralising antibody is the  
198 most widely accepted protective correlate against a range of human respiratory  
199 viruses<sup>38</sup>. However, any relationship between *in vitro* neutralisation titres and *in vivo*  
200 protection for SARS-CoV-2 is unclear at present. We therefore developed a  
201 simulation model (see Methods) employing the estimated initial distributions of  
202 neutralisation titres and decay rates across subjects, to predict the time for titres to  
203 drop below a nominated cut-off of 1:40, selected based on the 1:40 hemagglutination  
204 inhibition titre (a surrogate for neutralisation activity) widely used as the 50%  
205 protective titre for influenza<sup>39</sup>. Notably, 43% of our cohort were already below this  
206 threshold in early convalescence, with 64% of subjects dropping below this threshold  
207 in late convalescence. Simulating a population of 1000 individuals, and running the  
208 model 1000 times, we find the median time for 50% of the population to drop below a  
209 titre of 1:40 was 74 days (Fig 4C; 95% confidence interval 46 to >1000 days).  
210 Assuming early neutralisation titres predicted titres into late convalescence, our  
211 simulation also allows us to estimate how higher initial levels of neutralisation may  
212 affect the proportion of individuals maintaining titres above 1:40. We found that if  
213 aiming for a median of 50% of individuals with a titre above 1:40 at one year, initial  
214 neutralisation titres at about day 30 would need to be in the order of 2.1-fold higher  
215 than that observed in our convalescent cohort (95% CI = no increase to 16.9-fold



216 increase required). It is important to emphasise that at present the in vitro  
217 neutralisation titre required and the additive contribution of other immune responses  
218 to protective immunity are unknown. In addition, our analysis assumes that immunity  
219 to vaccination decays at a similar rate to infection, and that the decay of neutralisation  
220 titre from day 70 to around 140 predicts immune decay over the first year. Despite the  
221 limitations inherent in these assumptions, this analysis provides an approach to  
222 estimating the target level of immune response necessary for effective vaccination.  
223  
224 Overall, we find that both neutralising and binding antibody responses decay as  
225 expected after recovery from COVID-19, assessed using polyclonal assays and at the  
226 level of single clonotypes. While incredibly durable protective antibody responses  
227 have been reported for other viral infections such as measles and smallpox<sup>4</sup>, our data  
228 suggests that SARS-CoV-2 is more likely to mirror immunity to endemic CCC, where  
229 serum antibody responses decline with a likelihood of increasing susceptibility to  
230 homologous virus within 1-2 years<sup>5</sup>. Neutralising antibody is a presumed but not yet  
231 proven correlate of immune protection for SARS-CoV-2. Assuming similar immune  
232 kinetics, our modelling suggests SARS-CoV-2 vaccines would likely need to elicit  
233 substantially more potent neutralising titres than infection to induce durable  
234 protection. Encouragingly, many early vaccine candidates have exceeded this metric  
235 when compared against sera from convalescent subjects in clinical trials reported to  
236 date<sup>40,41</sup>. Persistence of serum antibody is unlikely to be the sole determinant of long-  
237 lasting immunity, with anamnestic recall of stably maintained memory T and B cell  
238 populations likely reducing infection or disease. The magnitude, quality and  
239 protective potential of cellular responses against SARS-CoV-2 requires further  
240 definition. Although T cell memory in the blood contracts several months post

241 infection, a rise in S-specific IgG+ memory B cells to a median level of ~0.8% of all  
242 IgG+ memory B cells by 4 months suggests even mild-moderate COVID-19 induces  
243 substantial cellular immune memory.

244

## 245 **Materials and Methods**

### 246 **Ethics Statement**

247 The study protocols were approved by the University of Melbourne Human Research  
248 Ethics Committee (#2056689) and the Southern Adelaide Clinical Human Research  
249 Ethics Committee (#39.034), and all associated procedures were carried out in  
250 accordance with the approved guidelines. All participants provided written informed  
251 consent in accordance with the Declaration of Helsinki.

### 252 **Subject recruitment and sample collection**

253 Subjects who had recovered from COVID-19 were recruited through contacts with the  
254 investigators and invited to provide serial blood samples. Subject characteristics of  
255 SARS-CoV-2 convalescent subjects are collated in Extended Data Fig 1. For all  
256 participants, whole blood was collected with sodium heparin anticoagulant. Plasma  
257 was collected and stored at -80°C, and PBMCs were isolated via Ficoll-Paque  
258 separation, cryopreserved in 10% DMSO/FCS and stored in liquid nitrogen.

259

### 260 **Microneutralisation Assay**

261 SARS-CoV-2 isolate CoV/Australia/VIC01/2020<sup>42</sup> was passaged in Vero cells and  
262 stored at -80C. Plasma was heat-inactivated at 56°C for 30 min. Plasma was serially-  
263 diluted 1:20 to 1:10240 before addition of 100 TCID<sub>50</sub> of SARS-CoV-2 in  
264 MEM/0.5% BSA and incubation at room temperature for 1 hour. Residual virus  
265 infectivity in the plasma/virus mixtures was assessed in quadruplicate wells of Vero

266 cells incubated in serum-free media containing 1 µg/ml TPCK trypsin at 37°C/5%  
267 CO<sub>2</sub>; viral cytopathic effect was read on day 5. The neutralising antibody titre is  
268 calculated using the Reed/Muench method as previously described<sup>43,44</sup>. All samples  
269 were assessed in two independent microneutralisation assays.

## 270 **Expression of SARS-CoV-2 proteins**

271  
272 A set of proteins was generated for serological and flow cytometric assays. The  
273 ectodomain of SARS-CoV-2 (isolate WHU1; residues 1 – 1208) was synthesised with  
274 furin cleavage site removed and P986/987 stabilisation mutations<sup>45</sup>, a C-terminal T4  
275 trimerisation domain, Avitag and His-tag, expressed in Expi293 cells and purified by  
276 Ni-NTA affinity and size-exclusion chromatography using a Superose 6 16/70 column  
277 (GE Healthcare). SARS-CoV S was biotinylated using Bir-A (Avidity). The SARS-  
278 CoV-2 RBD<sup>46</sup> with a C-terminal His-tag (residues 319-541; kindly provided by  
279 Florian Krammer) was similarly expressed and purified.

280

## 281 **SARS-CoV-2 bead-based multiplex assay**

282 The isotypes and subclasses of SARS-CoV-2 specific antibodies were detected as  
283 previously described<sup>25</sup>. Briefly, a panel of SARS-CoV-2 antigens including trimeric  
284 S, S1 (Sino Biological), S2 (ACROBiosystems), NP (ACROBiosystems,) and RBD<sup>46</sup>  
285 were coupled to magnetic COOH- bioplex beads (Biorad) using a two-step  
286 carbodiimide coupling reaction. 20µl of bead mixture containing 1000 beads per  
287 region and 20µl of 1:200 diluted plasma were added per well. SARS-CoV-2- specific  
288 antibodies were detected using phycoerythrin (PE)-conjugated mouse anti-human  
289 pan-IgG, IgG1, IgG2, IgG3, IgA1 or IgA2 (Southern Biotech) at 1.3µg/ml, 25µl per  
290 well. For the detection of IgM, biotinylated mouse anti-human IgM (mAb MT22;  
291 MabTech) was added at 1.3µg/ml, 25µl per well followed by streptavidin-PE (SA-PE;

292 Thermo Fisher) at 1µg/ml. Plates were acquired by a FLEXMAP 3D (Luminex).  
293 Median fluorescence intensity (MFI) for each isotype/subclass detector was assessed.  
294 Background subtraction was conducted, removing background of blank (buffer only)  
295 wells. Multiplex assays were repeated twice as two independent experiments.

296

### 297 **RBD-ACE2 binding inhibition multiplex bead-based assay**

298 RBD protein was coupled to bioplex beads (Biorad) as described above. 20µl of RBD  
299 multiplex bead suspension containing 500 beads per well, 20µl of biotinylated  
300 Avitag-ACE2 (kindly provided by Dale Godfrey and Nicholas Gherardin), final  
301 concentration of 12.5µg/ml per well, along with 1:100 dilution of each subject's  
302 plasma were added to 384 well plates. Plates were covered and incubated at room  
303 temperature (RT) whilst shaking for 2 hours, and then washed twice with PBS  
304 containing 0.05% Tween20 (PBST). Biotinylated Avitag-ACE2 was detected using  
305 40µl per well of SA-PE at 4µg/ml, incubated with shaking for 1 hour at RT. 10µl of  
306 PE-Biotin amplifier (Thermo Fisher) at 10µg/ml was added and incubated for 1 hour  
307 with shaking at RT. Plates were washed and acquired on a FLEXMAP 3D (Luminex).  
308 Anti-SARS-CoV-2 RBD neutralising human IgG1 antibody (ACROBiosystems,  
309 USA) was included as a positive control, in addition to COVID-19 negative plasma  
310 and buffer only negative controls. The MFI of bound ACE2 was measured after  
311 background subtraction of no ACE2 controls. Maximal ACE2 binding MFI was  
312 determined by buffer only controls. % ACE2 binding inhibition was calculated as  
313  $100\% - (\% \text{ ACE2 binding MFI per sample} / \text{Maximal ACE2 binding})$ . RBD-ACE2  
314 binding inhibition multiplex assays were repeated independently twice.

315

316 **Flow cytometric detection of S- and RBD-specific memory B cells**

317 Probes for delineating SARS-CoV-2 S-specific B cells within cryopreserved human  
318 PBMC were generated by sequential addition of streptavidin-PE (Thermofisher) to  
319 trimeric S protein biotinylated using recombinant Bir-A (Avidity). SARS-CoV-2  
320 RBD protein was directly labelled to APC using an APC Conjugation Lightning-link  
321 kit (Abcam). Cells were stained with Aqua viability dye (Thermofisher). Monoclonal  
322 antibodies for surface staining included: CD19-ECD (J3-119) (Beckman Coulter),  
323 CD20 Alexa700 (2H7), IgM-BUV395 (G20-127), CD21-BUV737 (B-ly4), IgD-  
324 Cy7PE (IA6-2), IgG-BV786 (G18-145) (BD), CD14-BV510 (M5E2), CD3-BV510  
325 (OKT3), CD8a-BV510 (RPA-T8), CD16-BV510 (3G8), CD10-BV510 (HI10a),  
326 CD27-BV605 (O323) (Biolegend), IgA-Vio450 (clone) (Miltenyi). Cells were  
327 washed, fixed with 1% formaldehyde (Polysciences) and acquired on a BD  
328 LSR Fortessa or BD Aria II.

329

330 **Flow cytometric detection of antigen-specific cTFH, memory CD4+ T cells and**  
331 **memory CD8 T cells**

332 Cryopreserved human PBMC were thawed and rested for four hours at 37°C. Cells  
333 were cultured in 96-well plates at  $1 \times 10^6$  cells/well and stimulated for 20 hours with  
334  $2 \mu\text{g}/\text{peptide}/\text{mL}$  of peptide pools (15mer, overlapping by 11) covering the S1 or S2  
335 domains of SARS-CoV-2. Selected donors were also stimulated with SEB ( $1 \mu\text{g}/\text{mL}$ )  
336 as a positive control, or individual peptides at  $2 \mu\text{g}/\text{mL}$ : NCTFEYVSQPFLMDL (S1  
337 epitope; previously described in <sup>47</sup>); LPIGINITRFQTLA (S1 epitope);  
338 GWTFGAGAALQIPFA (S2 epitope); ALQIPFAMQMAYRFN (S2 epitope);  
339 LLQYGSFCTQLNRAL (S2 epitope; <sup>19,47</sup>); QALNTLVKQLSSNFG (S2 epitope).  
340 Following stimulation, cells were washed, stained with Live/dead Blue viability dye  
341 (ThermoFisher), and a cocktail of monoclonal antibodies: CD27 BUV737 (L128),

342 CD45RA PeCy7 (HI100), CD20 BUV805 (2H7), (BD Biosciences), CD3 BV510  
343 (SK7), CD4 BV605 (RPA-T4), CD8 BV650 (RPA-T8), CD25 APC (BC96), OX-40  
344 PerCP-Cy5.5 (ACT35), CD69 FITC (FN50), CD137 BV421 (4B4-1) (Biolegend),  
345 and CXCR5 PE (MU5UBEE, ThermoFisher). Cells were washed, fixed with 1%  
346 formaldehyde and acquired on a BD LSR Fortessa using BD FACS Diva.

347

348 **Mass spectrometry (MS)-based quantitative proteomics of serum anti-S1**  
349 **antibodies.** The workflow for anti-S1 proteomic profiling is shown in Extended Data  
350 Figure 4A. Briefly, antibodies against SARS-CoV-2 S1 spike protein were affinity-  
351 purified from convalescent plasma of COVID-19 subjects at different time points  
352 using S1 protein-coupled magnetic beads (Acrobiosystems). IgG heavy chains were  
353 isolated after reduced SDS-PAGE and digested with trypsin and chymotrypsin to  
354 generate peptides for LC-MS/MS using a Thermo Scientific Orbitrap Exploris 480  
355 mass spectrometer coupled to an Ultimate 3000 UHPLC (Dionex). De novo  
356 sequencing data analysis was performed by Peaks studio X-plus software  
357 (Bioinformatics Solution). Peptide sequences were referenced against recovered  
358 heavy chain immunoglobulin sequences generated from single sorted S-specific  
359 memory B cells<sup>19</sup> to identify matched CDR-H3 peptides. Anti-S1 clonotypic antibody  
360 expression levels were monitored by parallel reaction monitoring (PRM) as described  
361 previously<sup>28,48</sup>. Fragment ion extracted ion chromatograms (XICs) per CDR-H3  
362 peptide were visualized in Skyline version 20.1.0.155 (University of Washington) and  
363 inspected manually to ensure correct assignments. The annotated spectra of  
364 individual peptides and their corresponding XICs are shown in Supplementary  
365 Information.

366

### 367 **Estimating the decay rates**

368 We sought to predict the response variable ( $y_{ij}$  for patient  $i$  at timepoint  $j$ ) as a  
369 function of days post symptom onset, assay replicate (as a binary categorical variable)  
370 and a random effect for each individual (both in intercept and slope). The  
371 dependency of the response variables on days post symptom onset can be modelled by  
372 using one or two decay slopes. The model can be written as below:

373  $y_{ij} = \beta_0 + b_{0i} + \beta_1 R_{ij} + \beta_2 t_{ij} + b_{2i} t_{ij}$  – for a model with a single slope; and

374  $y_{ij} = \beta_0 + b_{0i} + \beta_1 R_{ij} + \beta_2 t_{ij} + b_{2i} t_{ij} + \beta_3 s_{ij} + b_{3i} s_{ij}$  – for a model with two  
375 different slopes, in which:

$$376 \quad s_{ij} = \begin{cases} 0, & t_{ij} < T_0 \\ t_{ij} - T_0, & t_{ij} \geq T_0. \end{cases}$$

377 The parameter  $\beta_0$  is a constant (intercept), and  $b_{0i}$  is a patient-specific adjustment to  
378 the overall intercept. The slope parameter  $\beta_2$  is a fixed effect to capture the decay  
379 slope before  $T_0$ ; which also has a subject-specific random effect  $b_{2i}$ . To fit a model  
380 with two different decay rates, an extra parameter  $\beta_3$  (with a subject-specific random  
381 effect  $b_{3i}$ ) was added to represent the difference between the two slopes. Assay  
382 variability between replicates was modelled as a single fixed effect  $\beta_1$ , in which we  
383 coded the replicate as a binary categorical variable  $R_{ij}$ .

384 The response variables obtained were highly variable, containing zeros where the  
385 value was below the limit of detection and contrasted with samples where very high  
386 levels were observed. Thus, we performed log transformations of the non-zero data to  
387 help normalize variability and censored every value less than 40 for the  
388 microneutralisation data; every value less than 0.01 for the T cell and B cell data; and  
389 every negative value for the multiplex data. More specifically, a mixed-effect  
390 regression method that allows for censoring at the limit of detection was used to

391 estimate the parameters in the model. This was done by using *lme* library in *R*, using  
392 the ML algorithm to fit for the fixed effects<sup>49</sup>. We also tested if the decay of  
393 serological response variables was fitted better by a single or two different decay  
394 slopes (likelihood ratio test – based on the likelihood value and the difference in the  
395 number of parameters). 95% CI for the fixed effect parameters was calculated based  
396 on the standard error estimates, which can be obtained directly by using the *varFix*  
397 function from *lme* library. These analyses were carried out in *R* version 4.0.2.

398

### 399 **Simulating the decay of serological neutralisation activity**

400 To understand the decay in serum neutralisation we employed a simulation approach  
401 using the parameters estimated from our mixed-effect censoring regression model of  
402 decay. The fixed effect estimates averaged the intercept across experimental replicates  
403 ( $\beta_0 + \beta_{1/2}$  from equations above) and random effects were randomly selected from a  
404 multivariate normal distribution with covariance matrix taken from the mixed-effect  
405 regression with censoring *lme* object. The residual error standard deviation for  
406 simulated data every 10 days was taken from the *lme* object. The confidence interval  
407 for the percentage of subjects with a neutralisation titre above 1:40 was estimated  
408 empirically with the percentile method by repeating the simulation 1000 times, where  
409 for each replicate the fixed effects were drawn from a normal distribution based on  
410 their standard error (as well as randomly selected random effects). To estimate the  
411 fold increase in initial neutralisation titre required to achieve >50% of individuals  
412 with a titre above 40 at 1 year we assumed that the rate of decay was constant from  
413 day 70 onwards and projected forward the expected titres in the simulated  
414 populations. The median and confidence intervals for the proportion of individuals  
415 with titre > 40 were calculated from these 1000 simulated populations.



416 **Statistical Analyses**

417 Associations between neutralisation, inhibition of ACE2 binding and antibody  
418 binding were assessed using both Spearman correlation, and multiple regression (R  
419 version 4.0.2). The geometric mean of replicate neutralisation measurements and the  
420 arithmetic mean of replicate measurements in other assays were used in the  
421 correlation and regression analyses for other measurements. Neutralisation titres  
422 below the limit of detection (a titre of 20) were assigned the arbitrary value 10 prior to  
423 calculating the geometric mean for the purposes of the Spearman correlation, where  
424 rank and not magnitude of the measurements is important. For the multiple regression  
425 analysis values below the limit of detection were set at the detection threshold and  
426 censoring regression was performed using the function *censReg* (from the *censReg*  
427 library<sup>50</sup>) to determine which measurements during early convalescence were  
428 significant predictors of neutralisation titre during late convalescence. Comparison of  
429 B and T cell frequencies at first and final sampling was performed using Wilcoxon  
430 Rank Sum test in GraphPad Prism 8. All statistical tests used were two sided.

431 **Competing interests**

432 The authors declare no competing interests.

433 **Data Availability**

434 All data are available from the corresponding author upon reasonable request.

435 **Code Availability**

436 All data analysis code can be made available on request.

437 **Authors' contributions**

438 A.K.W, J.A.J., J.J.W, H.-X.T., T.E.S., D.L.G., D.S.K., D.C., T.P.G, A.W.C., M.P.D.,  
439 and S.J.K. designed the study and experiments. A.K.W., J.A.J., J.J.W., K.J.S, A.R.,  
440 H.-X.T., W.S.L., K.M.W., H.G.K., R.E., S.K.D, H.E.K, F.L.M., T.E.S., and K.S.  
441 performed experiments. A.K.W., J.A.J., J.J.W, H.-X.T., W.S.L., A.R., D.S.K., T.E.S.,

442 D.C., K.S., M.P.D., S.J.K. analysed the experimental data. A.K.W, J.A.J., J.J.W,  
443 K.J.S, T.E.S., D.S.K., D.C., M.P.D., and S.J.K. wrote the manuscript. All authors  
444 reviewed the manuscript.

445

#### 446 **Acknowledgements**

447 We thank the generous participation of the trial subjects for providing samples. We  
448 thank E. Haycroft, E. Lopez, C. Nelson and T. Amarasena and C. Batten (University  
449 of Melbourne) for excellent technical assistance. The SARS-CoV-2 RBD expression  
450 plasmids were kindly provided by F. Krammer (Icahn School of Medicine at Mt  
451 Sinai). Recombinant human ACE2 was kindly provided by N. Gherardin and D.  
452 Godfrey (University of Melbourne). We acknowledge the Melbourne Cytometry  
453 Platform (Melbourne Brain Centre node) for provision of flow cytometry services.  
454 We thank T. Chataway and A. Colella (Flinders Proteomics Facility) for technical  
455 support with quantitative proteomics. This study was supported by the Victorian  
456 Government, an Australian government Medical Research Future Fund award  
457 GNT2002073 (SJK, MPD, and AKW), the ARC Centre of Excellence in Convergent  
458 Bio-Nano Science and Technology (SJK), an NHMRC program grant APP1149990  
459 (SJK and MPD), NHMRC project grant GNT1162760 (AKW), an NHMRC-EU  
460 collaborative award APP1115828 (SJK and MPD), the European Union Horizon 2020  
461 Research and Innovation Programme under grant agreement 681137 (SJK), Emergent  
462 Ventures Fast Grants (AWC), the Jack Ma Foundation (KS) and the A2 Milk  
463 Company (KS). JAJ, DSK, and SJK are supported by NHMRC fellowships. JJW is  
464 supported by Flinders University DVCR Fellowship and Flinders Health & Medical  
465 Research Institute COVID-19 Research Grant. AKW, KS, DC and MPD are  
466 supported by NHMRC Investigator grants. The Melbourne WHO Collaborating

467 Centre for Reference and Research on Influenza is supported by the Australian

468 Government Department of Health.

469

470 **Figure 1 – Dynamics of serological responses to SARS-CoV-2**

471 (A) Timeline of sample collection for each cohort participant (n=64 participants, 158  
472 total samples). Samples included only in serological analysis are indicated in black  
473 (n=33); samples included in both serological and cellular immune analysis are  
474 indicated in red (n=31). Shaded areas indicate early (<50 days) and late (>100 days)  
475 convalescent time periods, and dashed line indicates day 70 midpoint. (B)  
476 Longitudinal microneutralisation endpoint titre and (C) inhibition of ACE2 binding  
477 (%) for individuals. Best fit two-phase decay slope (red line) is indicated. (D)  
478 Individual kinetics and best fit decay slopes for IgG binding to spike (S), IgG binding  
479 to nucleoprotein (N), IgM binding to S and IgA1 binding to S. (E) Estimated half-life  
480 and confidence intervals of the neutralising antibody titre before day70 (red) and after  
481 day70 post-symptom onset (blue) are indicated as dashed vertical lines. Estimated  
482 early decay rates and confidence intervals for serological inhibition of ACE2 and  
483 antibody binding titres are indicated (single phase decay is shown in grey, two phase  
484 decay indicated in red/blue).

485

486 **Figure 2 - Quantification of S-specific memory B cell responses.**

487 (A) Staining class-switched B cells (CD19+IgD-) with SARS-CoV-2 spike probes  
488 allows the tracking of antigen-specific cells in subjects previously infected with  
489 SARS-CoV-2. (B) Frequencies of S-specific IgG+, IgA+ or IgM+ memory B cells as  
490 a proportion of CD19+CD20+IgD- B cells in PBMC samples were assessed  
491 longitudinally (n=31 subjects). (C) Comparison of S-specific IgG+, IgA+ or IgM+  
492 memory B cell frequencies at the earliest and latest timepoint available for each  
493 individual (n=31). Statistics assessed by two-tailed Wilcoxon test.

494

495 **Figure 3 - Quantification of antigen-specific CD4+ and CD8+ T cell responses.**

496 (A) Representative staining of AIM markers (CD25, OX-40) on CD4+ Tmem cells  
497 (CD3+CD4+CD8-CD45RA-CXCR5-) after stimulation with vehicle, S1 or S2 peptide  
498 pools in longitudinal samples from 1 participant (top row, day 33; middle row, day  
499 61; bottom row, day 143). (B) Representative staining of AIM markers (CD69,  
500 CD137) on CD8+ Tmem cells (CD3+CD8+CD4-non-naïve) in longitudinal samples  
501 from 1 participant (top row, day 41; middle row, day 85; bottom row, day 120). (C)  
502 Longitudinal changes in the frequency of total S (S1+S2 pool responses after  
503 background subtraction)-specific responses among cTFH, CD4+ and CD8+ Tmem  
504 subsets (n=31). (D) Comparison of S-specific T cell responses at the earliest and latest  
505 timepoint available for each individual (n=31). Statistics assessed by two-tailed  
506 Wilcoxon test.

507

508 **Figure 4 – Modelling of concomitant immune responses after COVID-19**

509 (A) Rates of decay of serological neutralisation activity, ACE2 binding inhibition, and  
510 S-specific IgG, IgM and IgA following recovery from SAR-CoV-2 infection. (B)  
511 Fitted Growth and decay rates for S-specific memory T cell and B cell frequencies in  
512 PBMC. (C) Simulation of elicitation and decay of serological neutralisation activity in  
513 1000 individuals based on distributions observed in our SARS-CoV-2 convalescent  
514 cohort. The simulation was repeated 1000 times to estimate the proportion of  
515 individuals maintaining a neutralisation titre above 1:40 across multiple simulations  
516 (median and 95% confidence intervals shown in red).

517

518 **Extended data figure 1. Demographic and clinical characteristics of the**  
519 **convalescent COVID-19 cohort.**

520

521 **Extended data figure 2: Fitting of the decline in antibody binding across**  
522 **different immunoglobulin isotypes.**

523 The best-fit model and half-lives are shown for the fitting of the decay of antibody  
524 binding to different SARS-CoV-2 antigens (n=64 subjects). Two-phase decay is  
525 indicated by red (before day 70) and blue (after day 70) shaded areas. No shading  
526 indicates where single-phase decay provided the best fit.

527

528 **Extended Data Figure 3: Correlation of antibody binding and ACE2 inhibition**  
529 **with neutralisation.**

530 A heat-map of Spearman correlations between neutralisation titre and the serological  
531 measurements of antibody binding (by isotype and antigen). Correlations were  
532 assessed in early ( $\leq 50$  days, left column n=54 subjects) and late ( $\geq 100$  days, right  
533 middle column, n=47 subjects) convalescence in all subjects where data was available.  
534 The association between early antibody binding and late neutralisation is also shown  
535 (right column, n=47 subjects). All correlations are Spearman correlations. \* $P \leq 0.05$ ,  
536 \*\* $P \leq 0.01$ , \*\*\* $P \leq 0.001$ .

537

538 **Extended Data Figure 4: MS-based quantification of immunoprecipitated S1-**  
539 **specific clonotypic antibodies.**

540 **(A)** Combined B cell receptor sequencing and proteomics platform enables  
541 identification and quantification of circulating anti-S1 antibodies. S1-specific IgG was  
542 purified from plasma of SARS-CoV-2 convalescent subjects using antigen-coupled  
543 magnetic beads and heavy chains subject to LC-MC/MS. Peptide spectra are searched

544 against B-cell receptor sequencers recovered from single sorted S-specific memory B  
545 cells from the same individuals to identify clonotypes based upon CDR-H3 amino  
546 acid sequence. Clonotype specific peptides are then used as barcodes for relative  
547 quantitative parallel reaction monitoring (PRM) for tracking in longitudinal plasma  
548 samples. Targeted peptides are monitored during elution from HPLC and individual  
549 peptides quantified based on abundance chromatography curves. **(B)** Clonotypes  
550 identified based on matched CDR-H3 sequences from S1-specific plasma IgG and B  
551 cell receptor sequences from SARS-CoV-2 convalescent subjects (n=4). **(C)**  
552 Longitudinal changes in the relative plasma abundance of anti-S1 clonotypes within  
553 four convalescent subjects over time. The quantity of each reference peptide is  
554 expressed as area under the curve (AUC) derived from extracted ion chromatography.

555

556 **Extended Data Figure 5: Activation status of S-specific IgG+ memory B cells.**

557 **(A)** Memory B cell phenotypes identified by CD21 and CD27 co-staining of S+  
558 CD19+CD20+IgD-IgG+ B cells (red) overlaid onto parental CD19+CD20+IgD-IgG+  
559 B cells (black) and **(B)** the corresponding frequencies of “activated” (CD27+CD21-)  
560 or resting (CD27+CD21+) in in PBMC samples were assessed longitudinally (n=31  
561 subjects).

562

563 **Extended Data Figure 6: RBD-specific memory B cell dynamics.**

564 **(A)** Frequencies of RBD-specific IgG+, IgA+ or IgM+ memory B cells as a  
565 proportion of CD19+CD20+IgD- B cells in PBMC samples were assessed  
566 longitudinally. **(B)** Comparison of RBD-specific IgG+, IgA+ or IgM+ memory B cell  
567 frequencies at the earliest and latest timepoint available for each individual (n=31).  
568 Statistics assessed by two-tailed Wilcoxon test.

569

570 **Extended Data Figure 7: Fitting of the kinetics of S- and RBD-specific memory B**  
571 **cell responses over time.**

572 The best-fit half-lives are shown for the fitting of the growth and/or decay of S- or  
573 RBD-specific memory B cells (n=31 subjects). Two-phase decay is indicated by red  
574 (before day 70) and blue (after day 70) shaded areas. No shading indicates where a  
575 single-phase decay model was used to fit the data.

576

577 **Extended Data Figure 8: Fitting of the decline in SARS-CoV-2-specific T cells**  
578 **over time.**

579 The best-fit half-lives are shown for the fitting of the decay of cTFH, CD4+ Tmem  
580 and CD8+ Tmem specific to total S (S1+S2 responses combined), S1 or S2 peptide  
581 pools (n=31 subjects). In all cases decay was fit with a single-phase decay model with  
582 the half-lives shown.

583

584 **Extended Data Figure 9: S1 and S2-specific CD4+ T cell responses.**

585 **(A, C)** Representative staining of AIM markers following S1 and S2 peptide pool  
586 stimulation among **(A)** cTFH (CD3+CD4+CD8-CD45RA-CXCR5+) or **(C)** CD4+  
587 Tmem cells and longitudinal cohort analysis (n=31). **(B, D)** Comparison of S1 or S2-  
588 specific **(B)** cTFH or **(D)** CD4+ Tmem responses at the earliest and latest visit for  
589 each participant, as well as paired frequency of S1 versus S2 responses at the initial or  
590 final visit (n=31). Statistics assessed by two-tailed Wilcoxon test.

591

592 **Extended Data Figure 10: Epitope-specific CD4+ T cell responses.**



593 (A) Representative staining of AIM markers following S1 or S2 peptide pool or  
594 individual peptide stimulation among the CD4<sup>+</sup> Tmem population. (B,C)  
595 Longitudinal peptide-specific frequencies in individual subjects (n=9; solid line,  
596 CD4<sup>+</sup> Tmem; dashed line, cTFH) for whom (B) multiple or (C) single epitopes were  
597 identified.

598 **References**

- 599 1. Deng, W., *et al.* Primary exposure to SARS-CoV-2 protects against reinfection  
600 in rhesus macaques. *Science (New York, N.Y.)* **369**, 818-823 (2020).
- 601 2. Chandrashekar, A., *et al.* SARS-CoV-2 infection protects against rechallenge  
602 in rhesus macaques. *Science (New York, N.Y.)* **369**, 812-817 (2020).
- 603 3. To, K.K., *et al.* COVID-19 re-infection by a phylogenetically distinct SARS-  
604 coronavirus-2 strain confirmed by whole genome sequencing. *Clinical*  
605 *infectious diseases : an official publication of the Infectious Diseases Society*  
606 *of America* (2020).
- 607 4. Amanna, I.J., Carlson, N.E. & Slifka, M.K. Duration of humoral immunity to  
608 common viral and vaccine antigens. *The New England journal of medicine*  
609 **357**, 1903-1915 (2007).
- 610 5. Edridge, A.W., *et al.* Coronavirus protective immunity is short-lasting.  
611 *medRxiv*, 2020.2005.2011.20086439 (2020).
- 612 6. Robbiani, D.F., *et al.* Convergent antibody responses to SARS-CoV-2 in  
613 convalescent individuals. *Nature* (2020).
- 614 7. Ibarrondo, F.J., *et al.* Rapid Decay of Anti-SARS-CoV-2 Antibodies in  
615 Persons with Mild Covid-19. *The New England journal of medicine* (2020).
- 616 8. Crawford, K.H., *et al.* Dynamics of neutralizing antibody titers in the months  
617 after SARS-CoV-2 infection. *medRxiv*, 2020.2008.2006.20169367 (2020).
- 618 9. Isho, B., *et al.* Mucosal versus systemic antibody responses to SARS-CoV-2  
619 antigens in COVID-19 patients. *medRxiv*, 2020.2008.2001.20166553 (2020).
- 620 10. Yao, X.-Y., *et al.* Neutralizing and binding antibody kinetics of COVID-19  
621 patients during hospital and convalescent phases. *medRxiv*,  
622 2020.2007.2018.20156810 (2020).
- 623 11. Wu, J., *et al.* SARS-CoV-2 infection induces sustained humoral immune  
624 responses in convalescent patients following symptomatic COVID-19.  
625 *medRxiv*, 2020.2007.2021.20159178 (2020).
- 626 12. Beaudoin-Bussières, G., *et al.* Decline of humoral responses against SARS-  
627 CoV-2 Spike in convalescent individuals. *bioRxiv*, 2020.2007.2009.194639  
628 (2020).
- 629 13. Rodda, L.B., *et al.* Functional SARS-CoV-2-specific immune memory persists  
630 after mild COVID-19. *medRxiv*, 2020.2008.2011.20171843 (2020).
- 631 14. Seow, J., *et al.* Longitudinal evaluation and decline of antibody responses in  
632 SARS-CoV-2 infection. *medRxiv*, 2020.2007.2009.20148429 (2020).
- 633 15. Muecksch, F., *et al.* Longitudinal analysis of clinical serology assay  
634 performance and neutralising antibody levels in COVID19 convalescents.  
635 *medRxiv*, 2020.2008.2005.20169128 (2020).
- 636 16. Wajnberg, A., *et al.* SARS-CoV-2 infection induces robust, neutralizing  
637 antibody responses that are stable for at least three months. *medRxiv*,  
638 2020.2007.2014.20151126 (2020).
- 639 17. Brochot, E., *et al.* Anti-Spike, anti-Nucleocapsid and neutralizing antibodies in  
640 SARS-CoV-2 inpatients and asymptomatic carriers. *medRxiv*,  
641 2020.2005.2012.20098236 (2020).
- 642 18. Seydoux, E., *et al.* Analysis of a SARS-CoV-2-Infected Individual Reveals  
643 Development of Potent Neutralizing Antibodies with Limited Somatic  
644 Mutation. *Immunity* **53**, 98-105.e105 (2020).
- 645 19. Juno, J.A., *et al.* Humoral and circulating follicular helper T cell responses in  
646 recovered patients with COVID-19. *Nature medicine* (2020).

- 647 20. Schulien, I., *et al.* *Ex vivo* detection of SARS-CoV-2-specific  
648 CD8<sup>+</sup> T cells: rapid induction, prolonged contraction, and formation of  
649 functional memory. *bioRxiv*, 2020.2008.2013.249433 (2020).
- 650 21. Neidleman, J., *et al.* SARS-CoV-2-specific T cells exhibit phenotypic features  
651 of robust helper function, lack of terminal differentiation, and high  
652 proliferative potential. *Cell Rep Med*, 100081 (2020).
- 653 22. Grifoni, A., *et al.* Targets of T Cell Responses to SARS-CoV-2 Coronavirus in  
654 Humans with COVID-19 Disease and Unexposed Individuals. *Cell* **181**, 1489-  
655 1501.e1415 (2020).
- 656 23. Braun, J., *et al.* SARS-CoV-2-reactive T cells in healthy donors and patients  
657 with COVID-19. *Nature* (2020).
- 658 24. Habel, J.R., *et al.* Suboptimal SARS-CoV-2-specific CD8<sup>+</sup> T-cell response  
659 associated with the prominent HLA-A\*02:01 phenotype. *medRxiv*,  
660 2020.2008.2017.20176370 (2020).
- 661 25. Selva, K.J., *et al.* Distinct systems serology features in children, elderly and  
662 COVID patients. *medRxiv*, 2020.2005.2011.20098459 (2020).
- 663 26. Grandjean, L., *et al.* Humoral Response Dynamics Following Infection with  
664 SARS-CoV-2. *medRxiv*, 2020.2007.2016.20155663 (2020).
- 665 27. Singh, M., *et al.* Lymphoma Driver Mutations in the Pathogenic Evolution of  
666 an Iconic Human Autoantibody. *Cell* **180**, 878-894.e819 (2020).
- 667 28. Wang, J.J., *et al.* Molecular Profiling and Clonal Tracking of Secreted  
668 Rheumatoid Factors in Primary Sjögren's Syndrome. *Arthritis & rheumatology*  
669 (*Hoboken, N.J.*) **70**, 1617-1625 (2018).
- 670 29. Lau, D., *et al.* Low CD21 expression defines a population of recent germinal  
671 center graduates primed for plasma cell differentiation. *Science immunology*  
672 **2**(2017).
- 673 30. Davis, C.W., *et al.* Longitudinal Analysis of the Human B Cell Response to  
674 Ebola Virus Infection. *Cell* **177**, 1566-1582.e1517 (2019).
- 675 31. Matsuda, K., *et al.* Prolonged evolution of the memory B cell response  
676 induced by a replicating adenovirus-influenza H5 vaccine. *Science*  
677 *immunology* **4**(2019).
- 678 32. Wec, A.Z., *et al.* Longitudinal dynamics of the human B cell response to the  
679 yellow fever 17D vaccine. *Proceedings of the National Academy of Sciences*  
680 *of the United States of America* **117**, 6675-6685 (2020).
- 681 33. Brown, D.M., Dilzer, A.M., Meents, D.L. & Swain, S.L. CD4 T cell-mediated  
682 protection from lethal influenza: perforin and antibody-mediated mechanisms  
683 give a one-two punch. *Journal of immunology (Baltimore, Md. : 1950)* **177**,  
684 2888-2898 (2006).
- 685 34. Grifoni, A., *et al.* Targets of T Cell Responses to SARS-CoV-2 Coronavirus in  
686 Humans with COVID-19 Disease and Unexposed Individuals. *Cell* (2020).
- 687 35. Weiskopf, D., *et al.* Phenotype and kinetics of SARS-CoV-2-specific T cells  
688 in COVID-19 patients with acute respiratory distress syndrome. *Science*  
689 *immunology* **5**(2020).
- 690 36. Mateus, J., *et al.* Selective and cross-reactive SARS-CoV-2 T cell epitopes in  
691 unexposed humans. *Science (New York, N.Y.)* (2020).
- 692 37. Crotty, S., *et al.* Cutting edge: long-term B cell memory in humans after  
693 smallpox vaccination. *Journal of immunology (Baltimore, Md. : 1950)* **171**,  
694 4969-4973 (2003).
- 695 38. Plotkin, S.A. Updates on immunologic correlates of vaccine-induced  
696 protection. *Vaccine* **38**, 2250-2257 (2020).

- 697 39. Cox, R.J. Correlates of protection to influenza virus, where do we go from  
698 here? *Human vaccines & immunotherapeutics* **9**, 405-408 (2013).  
699 40. Keech, C., *et al.* Phase 1-2 Trial of a SARS-CoV-2 Recombinant Spike  
700 Protein Nanoparticle Vaccine. *The New England journal of medicine* (2020).  
701 41. Jackson, L.A., *et al.* An mRNA Vaccine against SARS-CoV-2 - Preliminary  
702 Report. *The New England journal of medicine* (2020).  
703 42. Caly, L., *et al.* Isolation and rapid sharing of the 2019 novel coronavirus  
704 (SARS-CoV-2) from the first patient diagnosed with COVID-19 in Australia.  
705 *Med J Aust* **212**, 459-462 (2020).  
706 43. Houser, K.V., *et al.* Prophylaxis With a Middle East Respiratory Syndrome  
707 Coronavirus (MERS-CoV)-Specific Human Monoclonal Antibody Protects  
708 Rabbits From MERS-CoV Infection. *The Journal of infectious diseases* **213**,  
709 1557-1561 (2016).  
710 44. Subbarao, K., *et al.* Prior infection and passive transfer of neutralizing  
711 antibody prevent replication of severe acute respiratory syndrome coronavirus  
712 in the respiratory tract of mice. *Journal of virology* **78**, 3572-3577 (2004).  
713

#### 714 **Methods References:**

- 715 45. Wrapp, D., *et al.* Cryo-EM structure of the 2019-nCoV spike in the prefusion  
716 conformation. *Science (New York, N.Y.)* **367**, 1260-1263 (2020).  
717 46. Amanat, F., *et al.* A serological assay to detect SARS-CoV-2 seroconversion  
718 in humans. *Nature medicine* (2020).  
719 47. Peng, Y., *et al.* Broad and strong memory CD4+ and CD8+ T cells induced by  
720 SARS-CoV-2 in UK convalescent individuals following COVID-19. *Nature*  
721 *immunology* (2020).  
722 48. Wang, J.J., Colella, A.D., Beroukas, D., Chataway, T.K. & Gordon, T.P.  
723 Precipitating anti-dsDNA peptide repertoires in lupus. *Clinical and*  
724 *experimental immunology* **194**, 273-282 (2018).  
725 49. Vaida, F. & Liu, L. Fast Implementation for Normal Mixed Effects Models  
726 With Censored Response. *J Comput Graph Stat* **18**, 797-817 (2009).  
727 50. Henningsen, A. censReg: Censored Regression (Tobit) Models. (2017).  
728

**A**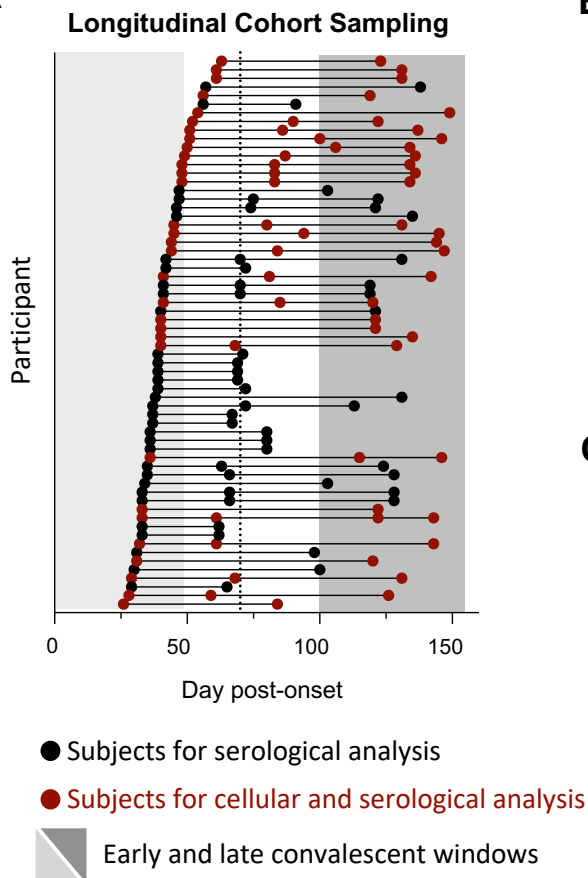**B**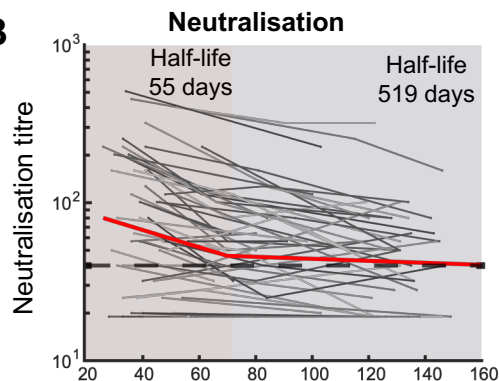**C**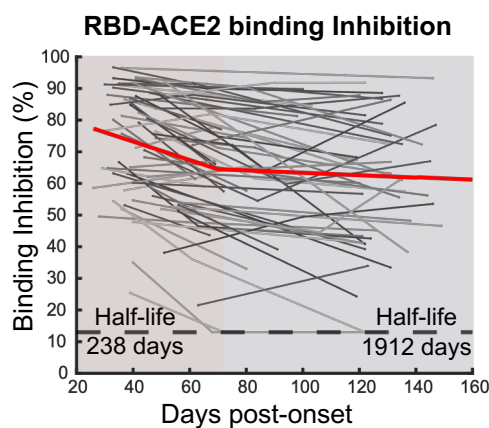**D**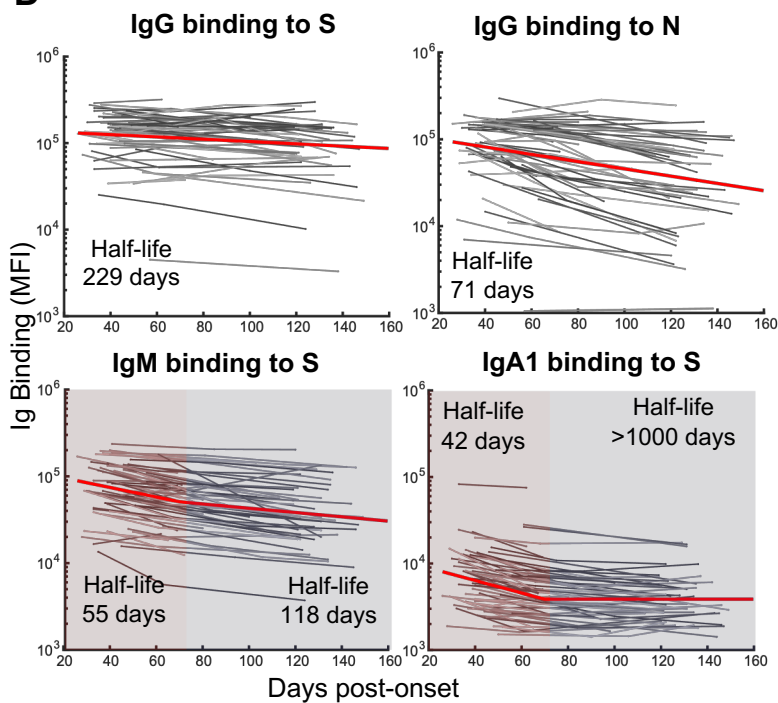**E**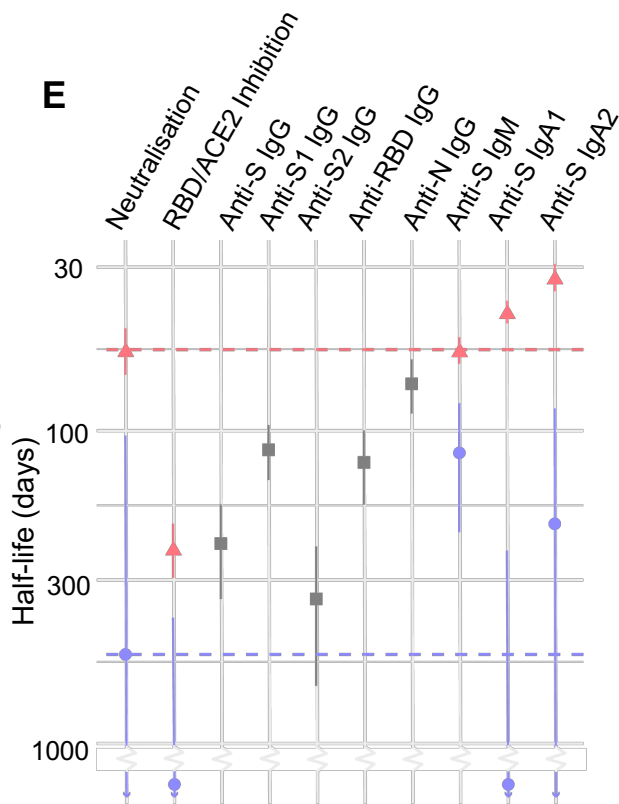

## Figure 1 – Dynamics of serological responses to SARS-CoV-2

(A) Timeline of sample collection for each cohort participant (n=64 participants, 158 total samples). Samples included only in serological analysis are indicated in black (n=33); samples included in both serological and cellular immune analysis are indicated in red (n=31). Shaded areas indicate early ( $\leq 50$  days) and late ( $\geq 100$  days) convalescent time periods, and dashed line indicates day 70 midpoint. (B) Longitudinal microneutralisation endpoint titre and (C) inhibition of RBD-ACE2 binding (%) for individuals. Best fit two-phase decay slope (red line) is indicated. (D) Individual kinetics and best fit decay slopes for IgG binding to spike (S), IgG binding to nucleoprotein (N), IgM binding to S and IgA1 binding to S. (E) Estimated half-life and confidence intervals of the neutralising antibody titre before day70 (red) and after day70 post-symptom onset (blue) are indicated as dashed vertical lines. Estimated early decay rates and confidence intervals for serological inhibition of ACE2 and antibody binding titres are indicated (single phase decay is shown in grey, two phase decay indicated in red/blue).

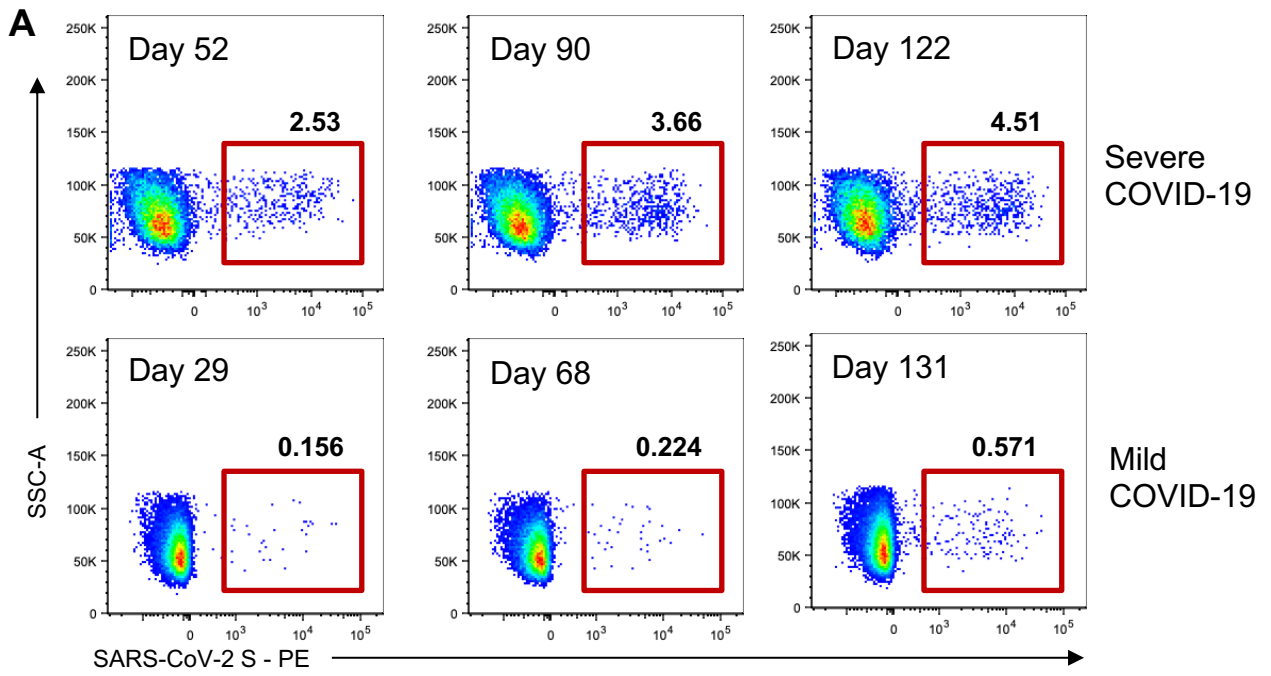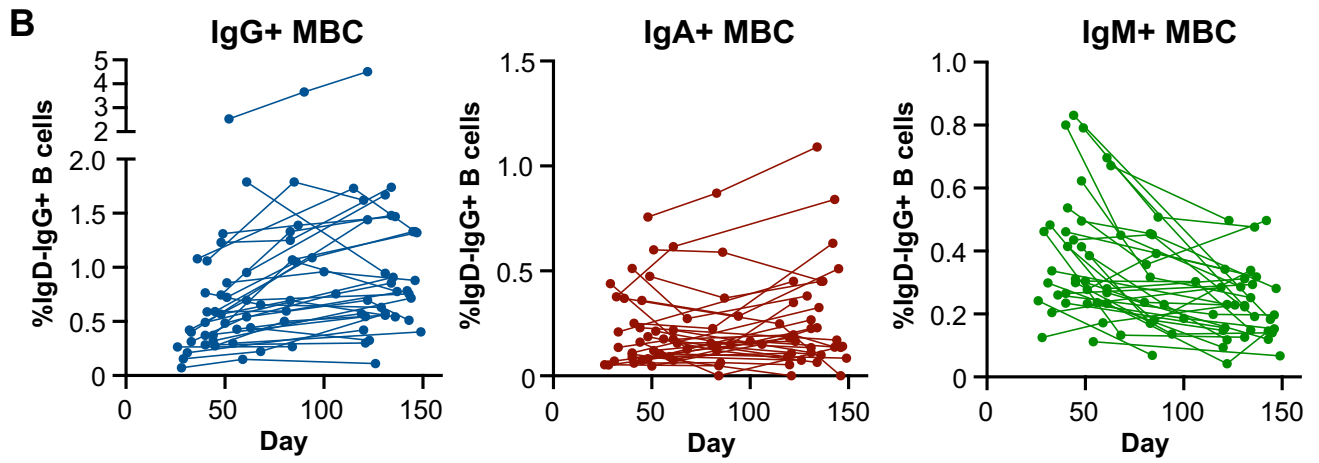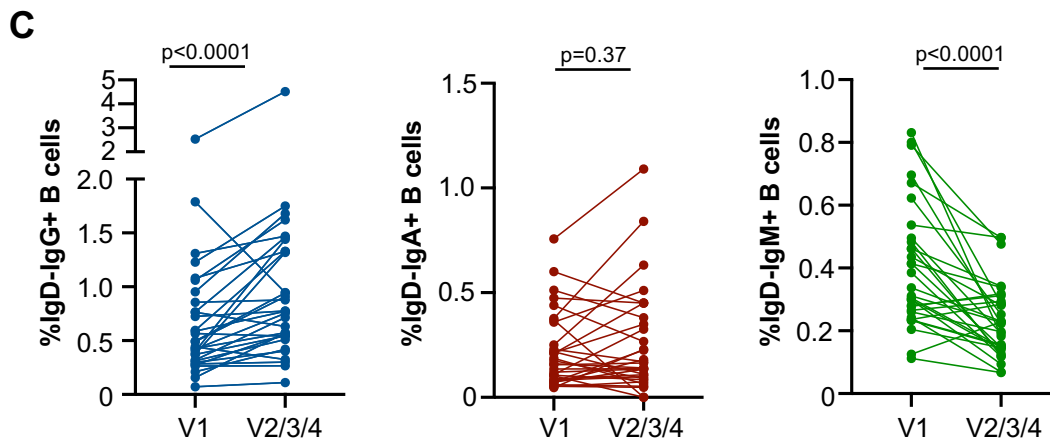

**Figure 2 - Quantification of S-specific memory B cell responses.**

(A) Staining class-switched B cells (CD19+IgD-) with SARS-CoV-2 spike probes allows the tracking of antigen-specific cells in subjects previously infected with SARS-CoV-2. (B) Frequencies of S-specific IgG+, IgA+ or IgM+ memory B cells as a proportion of CD19+CD20+IgD- B cells in PBMC samples were assessed longitudinally (n=31 subjects). (C) Comparison of S-specific IgG+, IgA+ or IgM+ memory B cell frequencies at the earliest and latest timepoint available for each individual (n=31). Statistics assessed by two-tailed Wilcoxon test.



**A** CD4<sup>+</sup>CD45RA<sup>-</sup>CXCR5<sup>-</sup> (Tmem)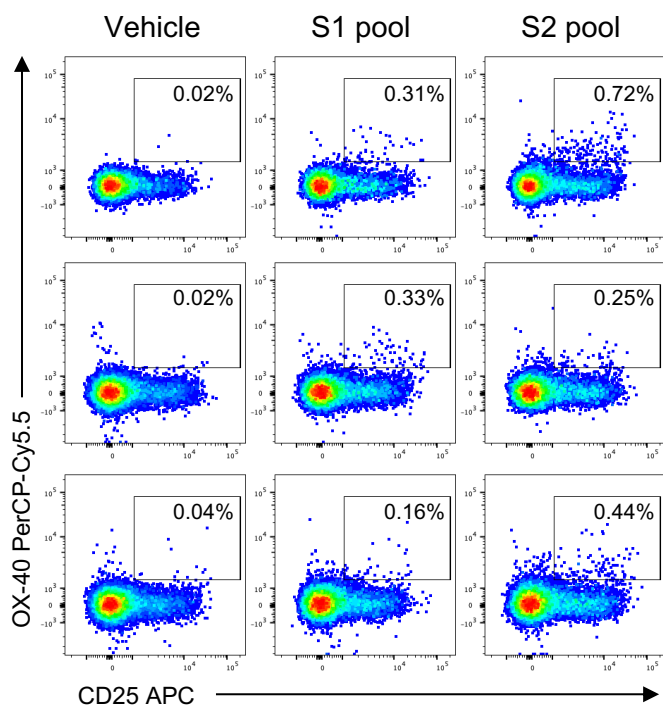**B** CD8<sup>+</sup> Tmem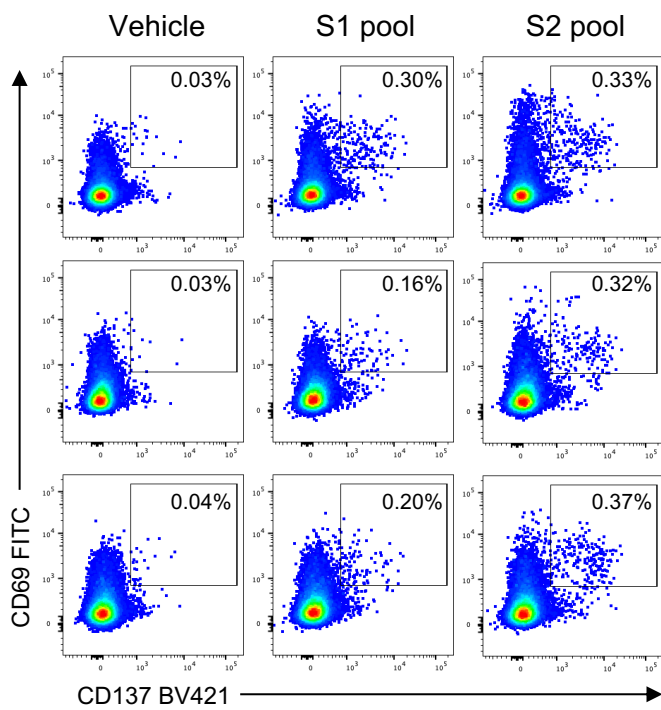**C**

cTFH

CD4<sup>+</sup> TmemCD8<sup>+</sup> Tmem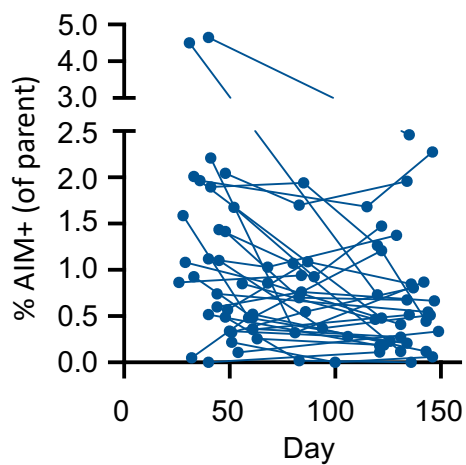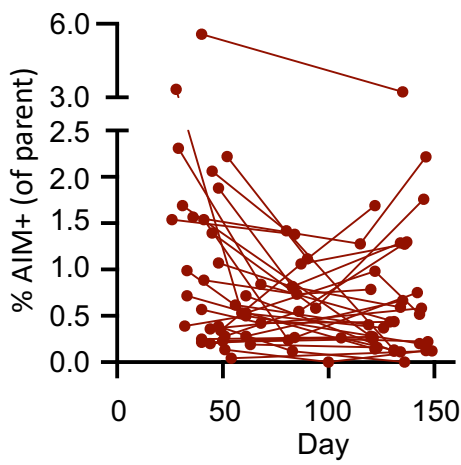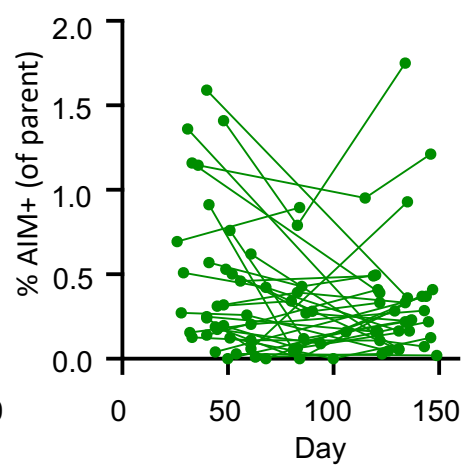**D**

p=0.0031

p=0.022

p=0.32

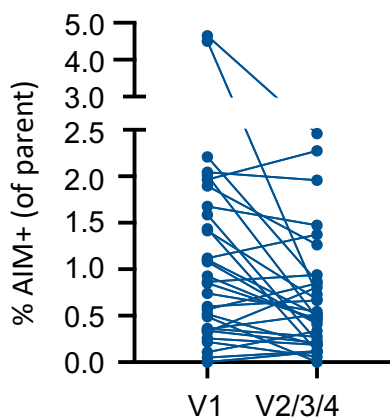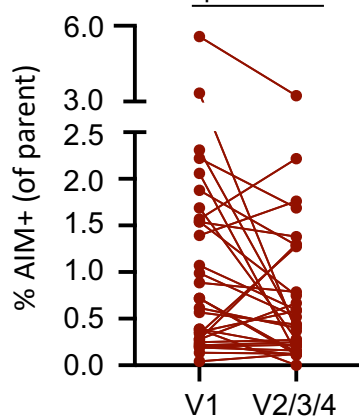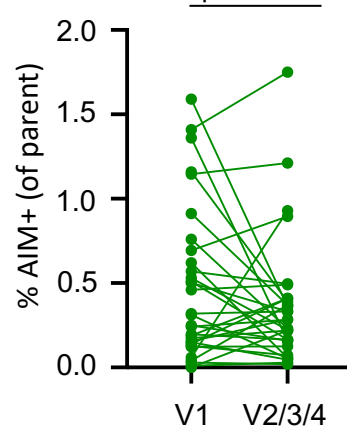

**Figure 3 - Quantification of antigen-specific CD4+ and CD8+ T cell responses.**

(A) Representative staining of AIM markers (CD25, OX-40) on CD4+ Tmem cells (CD3+CD4+CD8-CD45RA-CXCR5-) after stimulation with vehicle, S1 or S2 peptide pools in longitudinal samples from 1 participant (top row, day 33; middle row, day 61; bottom row, day 143). (B) Representative staining of AIM markers (CD69, CD137) on CD8+ Tmem cells (CD3+CD8+CD4-non-naïve) in longitudinal samples from 1 participant (top row, day 41; middle row, day 85; bottom row, day 120). (C) Longitudinal changes in the frequency of total S (S1+S2 pool responses after background subtraction)-specific responses among cTFH, CD4+ and CD8+ Tmem subsets (n=31). (D) Comparison of S-specific T cell responses at the earliest and latest timepoint available for each individual (n=31). Statistics assessed by two-tailed Wilcoxon test.

**A**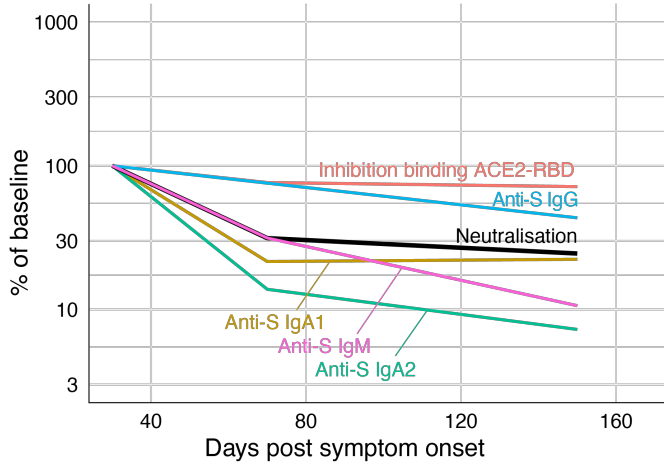**B**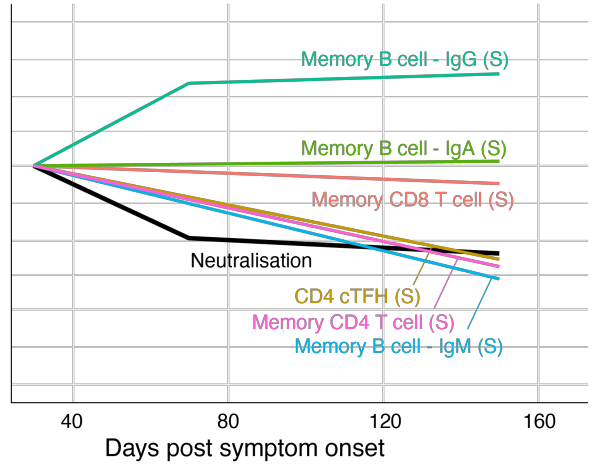**C**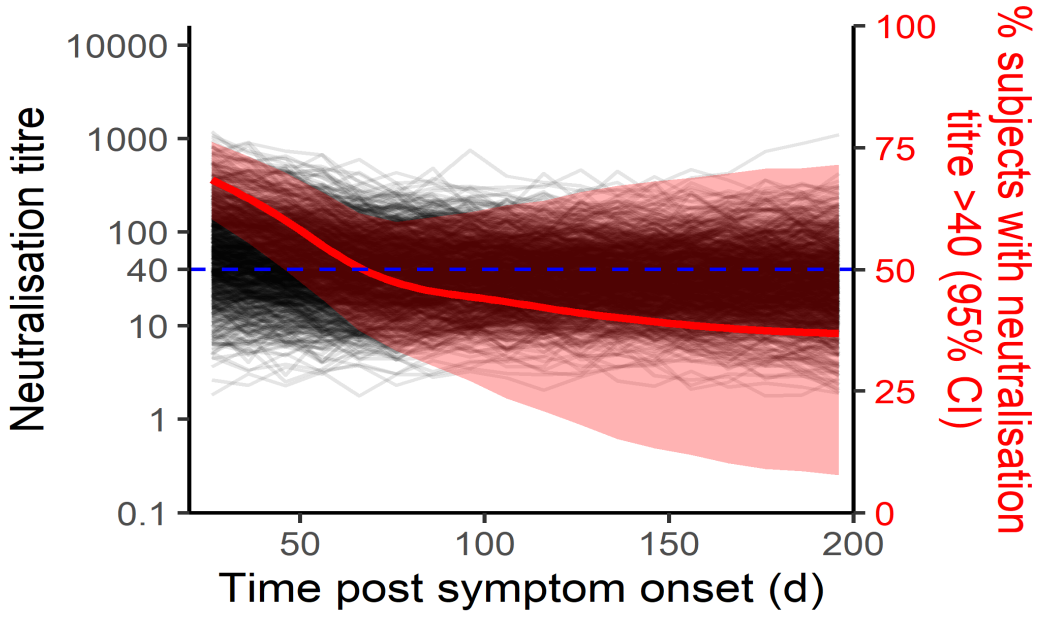

#### **Figure 4 – Modelling of concomitant immune responses after COVID-19**

(A) Rates of decay of serological neutralisation activity, ACE2 binding inhibition, and S-specific IgG, IgM and IgA following recovery from SAR-CoV-2 infection. (B) Fitted Growth and decay rates for S-specific memory T cell and B cell frequencies in PBMC. (C) Simulation of elicitation and decay of serological neutralisation activity in 1000 individuals based on distributions observed in our SARS-CoV-2 convalescent cohort. The simulation was repeated 1000 times to estimate the proportion of individuals maintaining a neutralisation titre above 1:40 across multiple simulations (median and 95% confidence intervals shown in red).

# **Extended Data Figures**

|                                | Full Cohort<br>(n=64) | Cellular Analysis Cohort<br>(n=31) |
|--------------------------------|-----------------------|------------------------------------|
| Age, median (IQR)              | 55 (62, 49)           | 52 (56, 31)                        |
| Gender, % female (n)           | 43.8% (28)            | 45.2% (14)                         |
| Disease severity, % (n) - mild | 68.8% (44)            | 74.2% (23)                         |
| - moderate                     | 23.4% (15)            | 16.1% (5)                          |
| - severe                       | 7.8% (5)              | 9.7% (3)                           |
| Positive PCR test, % (n)       | 84.4% (54)            | 83.9% (26)                         |

**Extended data figure 1. Demographic and clinical characteristics of the convalescent COVID-19 cohort.**

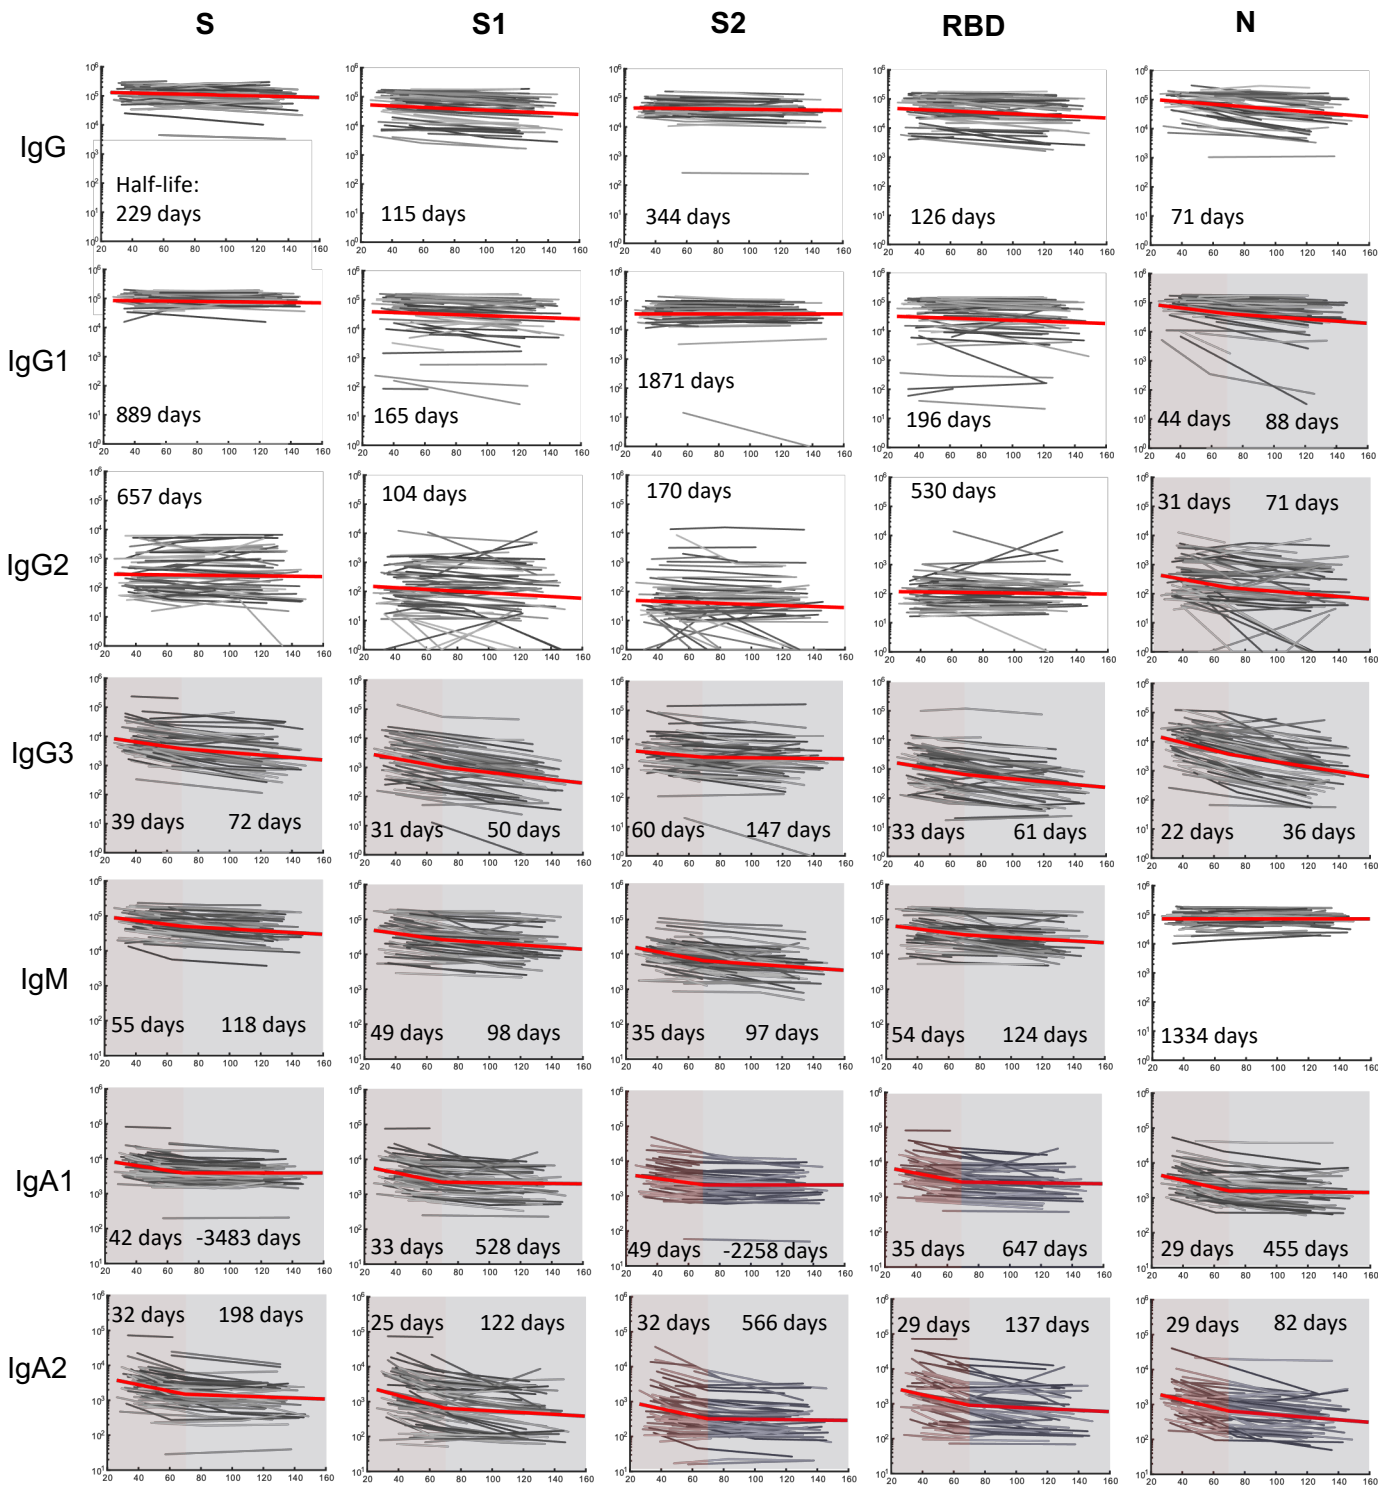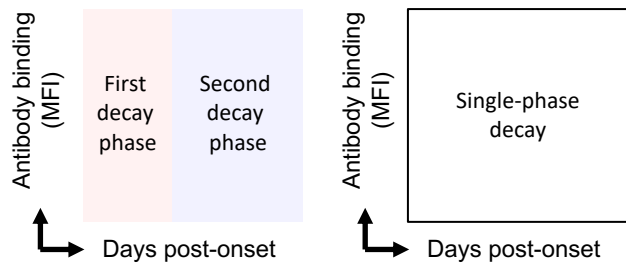

**Extended data figure 2: Fitting of the decline in antibody binding across different immunoglobulin isotypes.**

The best-fit model and half-lives are shown for the fitting of the decay of antibody binding to different SARS-CoV-2 antigens (n=64 subjects). Two-phase decay is indicated by red (before day 70) and blue (after day 70) shaded areas. No shading indicates where single-phase decay provided the best fit.



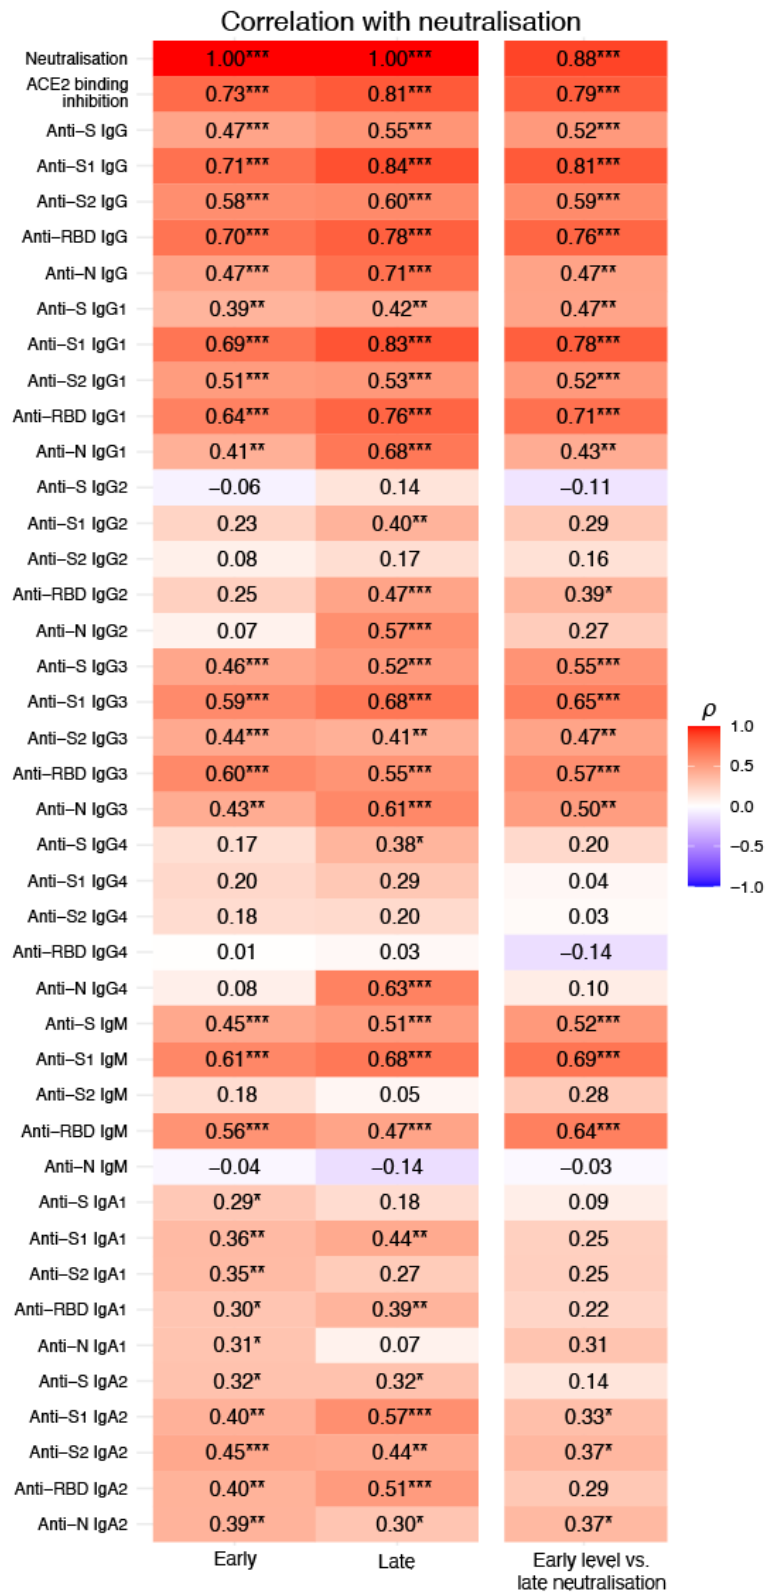

### Extended Data Figure 3: Correlation of antibody binding and ACE2 inhibition with neutralisation.

A heat-map of Spearman correlations between neutralisation titre and the serological measurements of antibody binding (by isotype and antigen). Correlations were assessed in early ( $\leq 50$  days, left column  $n=54$  subjects) and late ( $\geq 100$  days, right middle column,  $n=47$  subjects) convalescence in all subjects where data was available. The association between early antibody binding and late neutralisation is also shown (right column,  $n=47$  subjects). All correlations are Spearman correlations. \* $P \leq 0.05$ , \*\* $P \leq 0.01$ , \*\*\* $P \leq 0.001$ .

**A**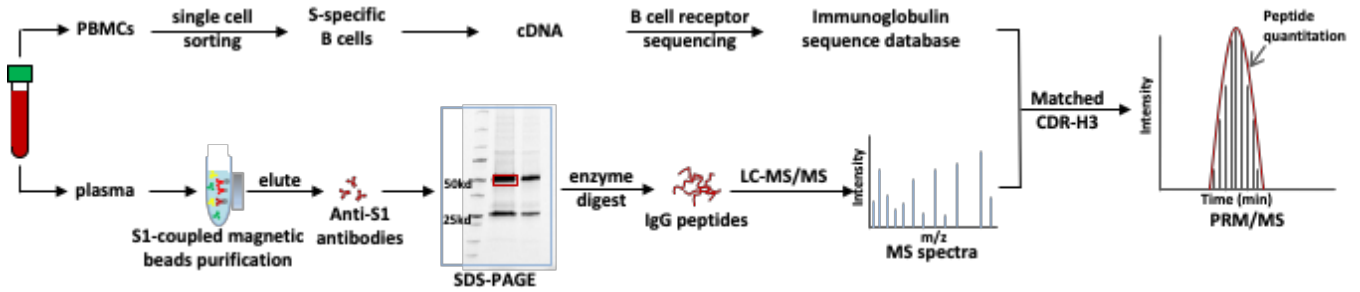**B**

| Subject | IGHV | IGHD | IGHJ | Translated CDR-H3 sequences                                          | Matched CDR-H3 peptide sequences                                                                                       |
|---------|------|------|------|----------------------------------------------------------------------|------------------------------------------------------------------------------------------------------------------------|
| CP04    | 1-3  | 3-10 | 6    | ARILGTRKYFDDSERDGMVW                                                 | KYFDDSERDGMVWQGTTVTVSSASTK (pep1)<br>KYFDDSER (pep2)                                                                   |
|         | 4-34 | 3-22 | 4    | ARDRYHYDSSGYSKNYRHFDYW                                               | DRYHYDSSGYSK (pep3)                                                                                                    |
| CP08    | 1-69 | 3-10 | 6    | VRGMYASGNYRGSDFYGMVW<br>VRGLYASGNFRGSDFYGMVW<br>VRGLYASGSYRGSDFYGMVW | GMYASGNYR (pep4)<br>GLYASGNFR (pep5)<br>GLYASGSYR (pep6)                                                               |
|         | 1-69 | 6-13 | 6    | ARVGAPIERTSSSWHYYYYGMVW                                              | VGAPIER (pep7)                                                                                                         |
|         | 4-31 | 6-6  | 4    | ARGFYEVYSSPTIKEYYFDYW                                                | GFYEVYSSPTIK (pep8)                                                                                                    |
|         | 3-7  | 3-16 | 4    | ARVKINPYDYVWGSYRYSRILDYW                                             | YDYVWGSYR (pep9)                                                                                                       |
| CP63    | 1-69 | 3-22 | 4    | ARLGRGDYDSSGYKVFYDYW                                                 | GDYDSSGYK (pep10)                                                                                                      |
| FCP01   | 1-46 | 3-10 | 6    | SRGITLVQGVVRLRPGSKEYYYYGLDVW                                         | YCSRGITL (pep11)<br>GITLVQGVV (pep12)<br>GFTLVQGVV (pep13)<br>VQGVVRL (pep14)<br>ALRPGSKEYY (pep15)<br>TLVQGVV (pep16) |

**C**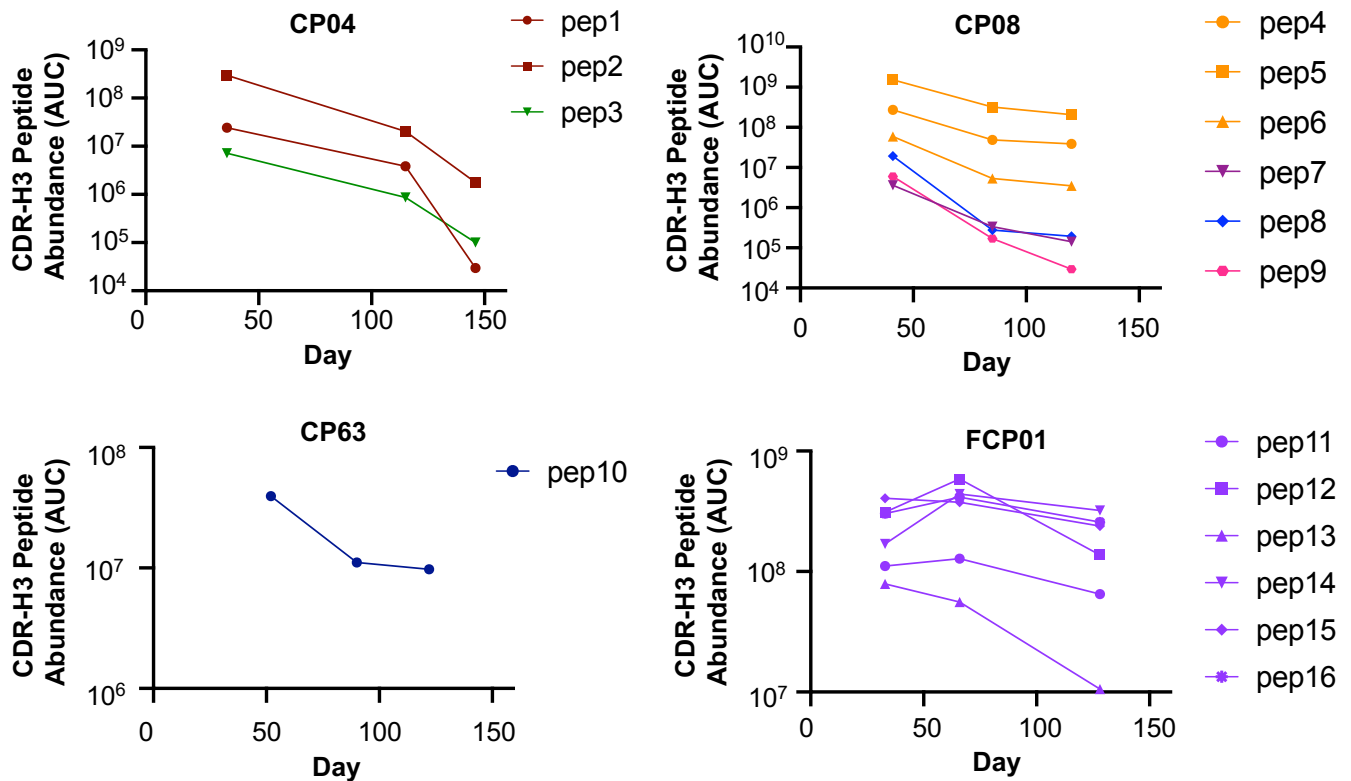

**Extended Data Figure 4: MS-based quantification of immunoprecipitated S1-specific clonotypic antibodies.**

(A) Combined B cell receptor sequencing and proteomics platform enables identification and quantification of circulating anti-S1 antibodies. S1-specific IgG was purified from plasma of SARS-CoV-2 convalescent subjects using antigen-coupled magnetic beads and heavy chains subject to LC-MC/MS. Peptide spectra are searched against B-cell receptor sequencers recovered from single sorted S-specific memory B cells from matched individuals to identify clonotypes based upon CDR-H3 amino acid sequence. Clonotype specific peptides are then used as barcodes for relative quantitative parallel reaction monitoring (PRM) for tracking in longitudinal plasma samples. Targeted peptides are monitored during elution from HPLC and individual peptides quantified based on abundance chromatography curves. (B) Clonotypes identified based on matched CDR-H3 sequences from S1-specific plasma IgG and B cell receptor sequences from SARS-CoV-2 convalescent subjects (n=4). (C) Longitudinal changes in the relative plasma abundance of anti-S1 clonotypes within four convalescent subjects over time. The quantity of each reference peptide is expressed as area under the curve (AUC) derived from extracted ion chromatography.

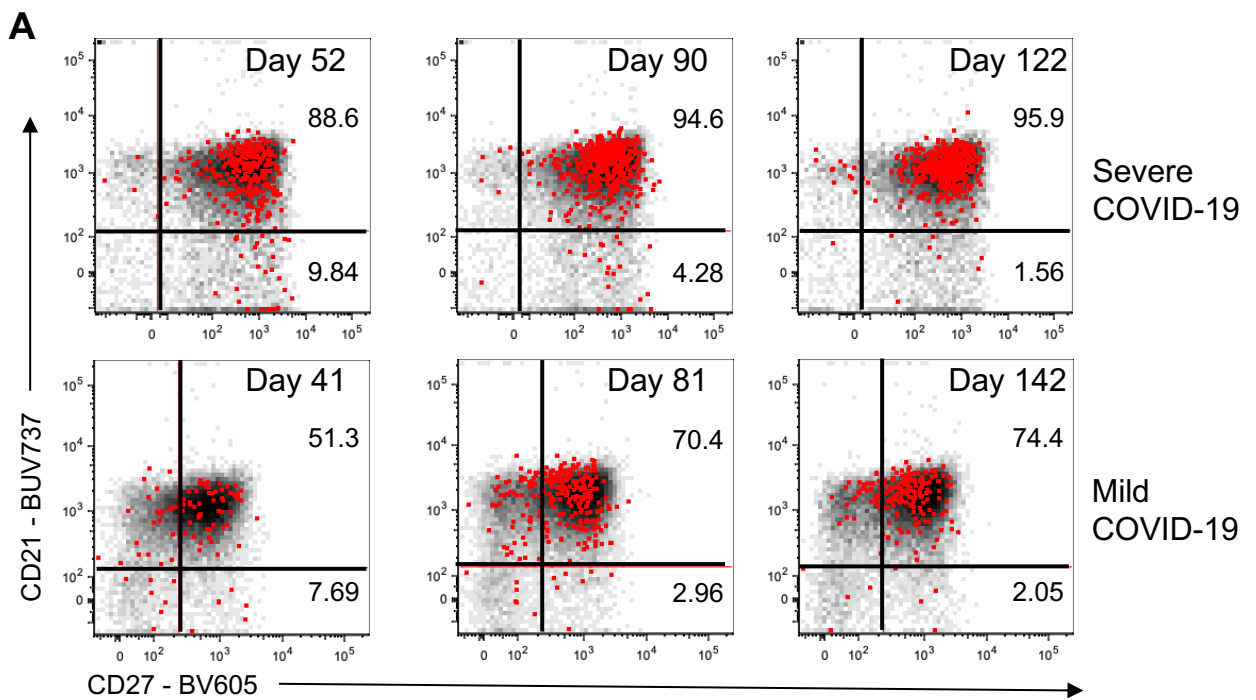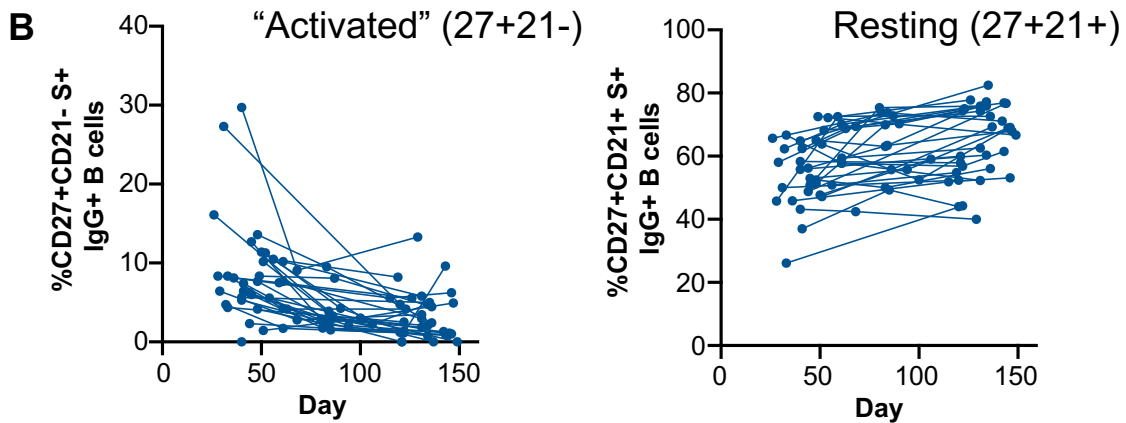

**Extended Data Figure 5: Activation status of S-specific IgG<sup>+</sup> memory B cells.**

(A) Memory B cell phenotypes identified by CD21 and CD27 co-staining of S<sup>+</sup>CD19<sup>+</sup>CD20<sup>+</sup>IgD-IgG<sup>+</sup> B cells (red) overlaid onto parental CD19<sup>+</sup>CD20<sup>+</sup>IgD-IgG<sup>+</sup> B cells (black) and (B) the corresponding frequencies of “activated” (CD27<sup>+</sup>CD21<sup>-</sup>) or resting (CD27<sup>+</sup>CD21<sup>+</sup>) in in PBMC samples were assessed longitudinally (n=31 subjects).

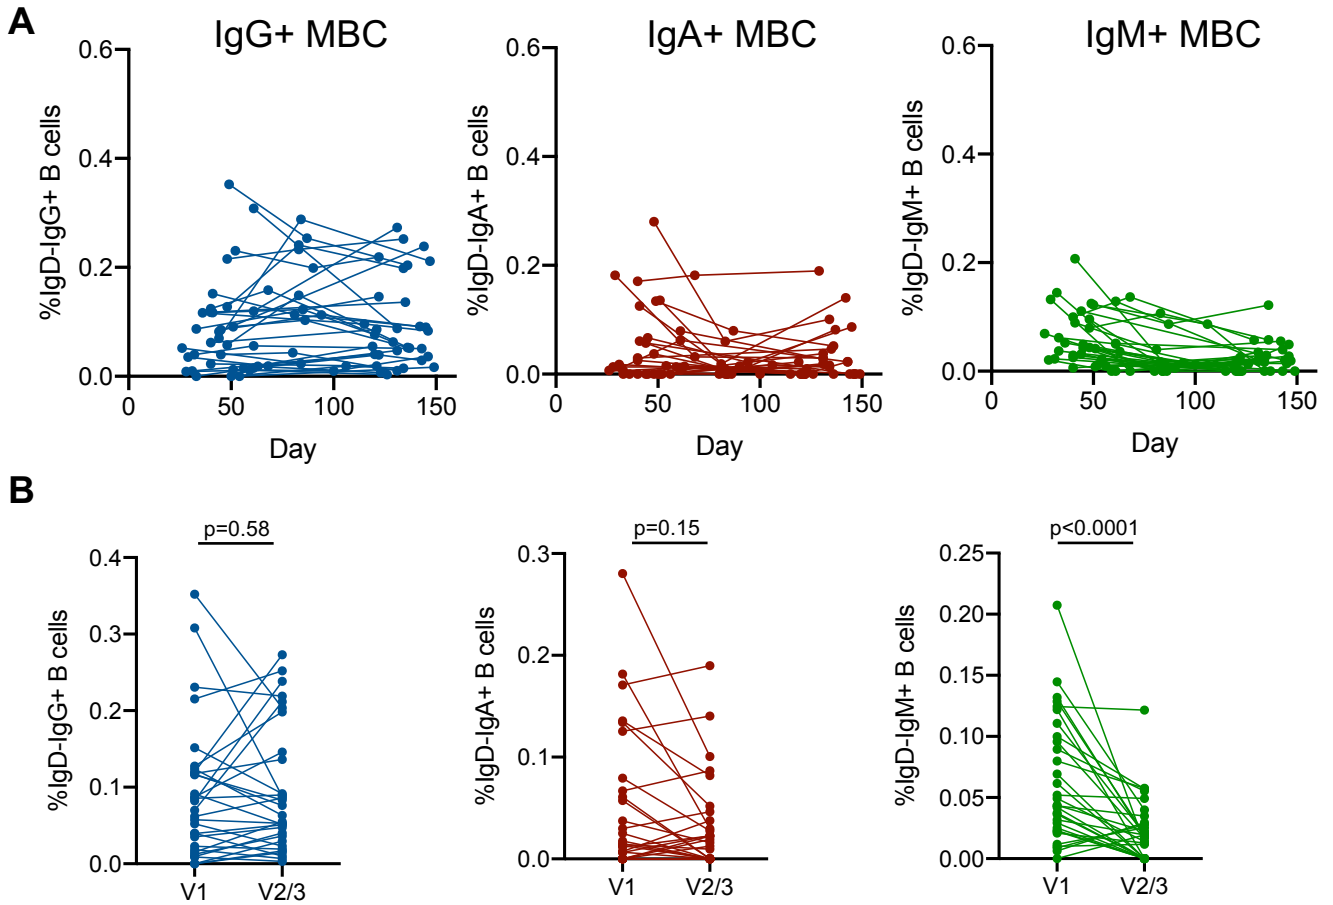

**Extended Data Figure 6: RBD-specific memory B cell dynamics.**

(A) Frequencies of RBD-specific IgG+, IgA+ or IgM+ memory B cells as a proportion of CD19+CD20+IgD- B cells in PBMC samples were assessed longitudinally. (B) Comparison of RBD-specific IgG+, IgA+ or IgM+ memory B cell frequencies at the earliest and latest timepoint available for each individual (n=31). Statistics assessed by two-tailed Wilcoxon test.

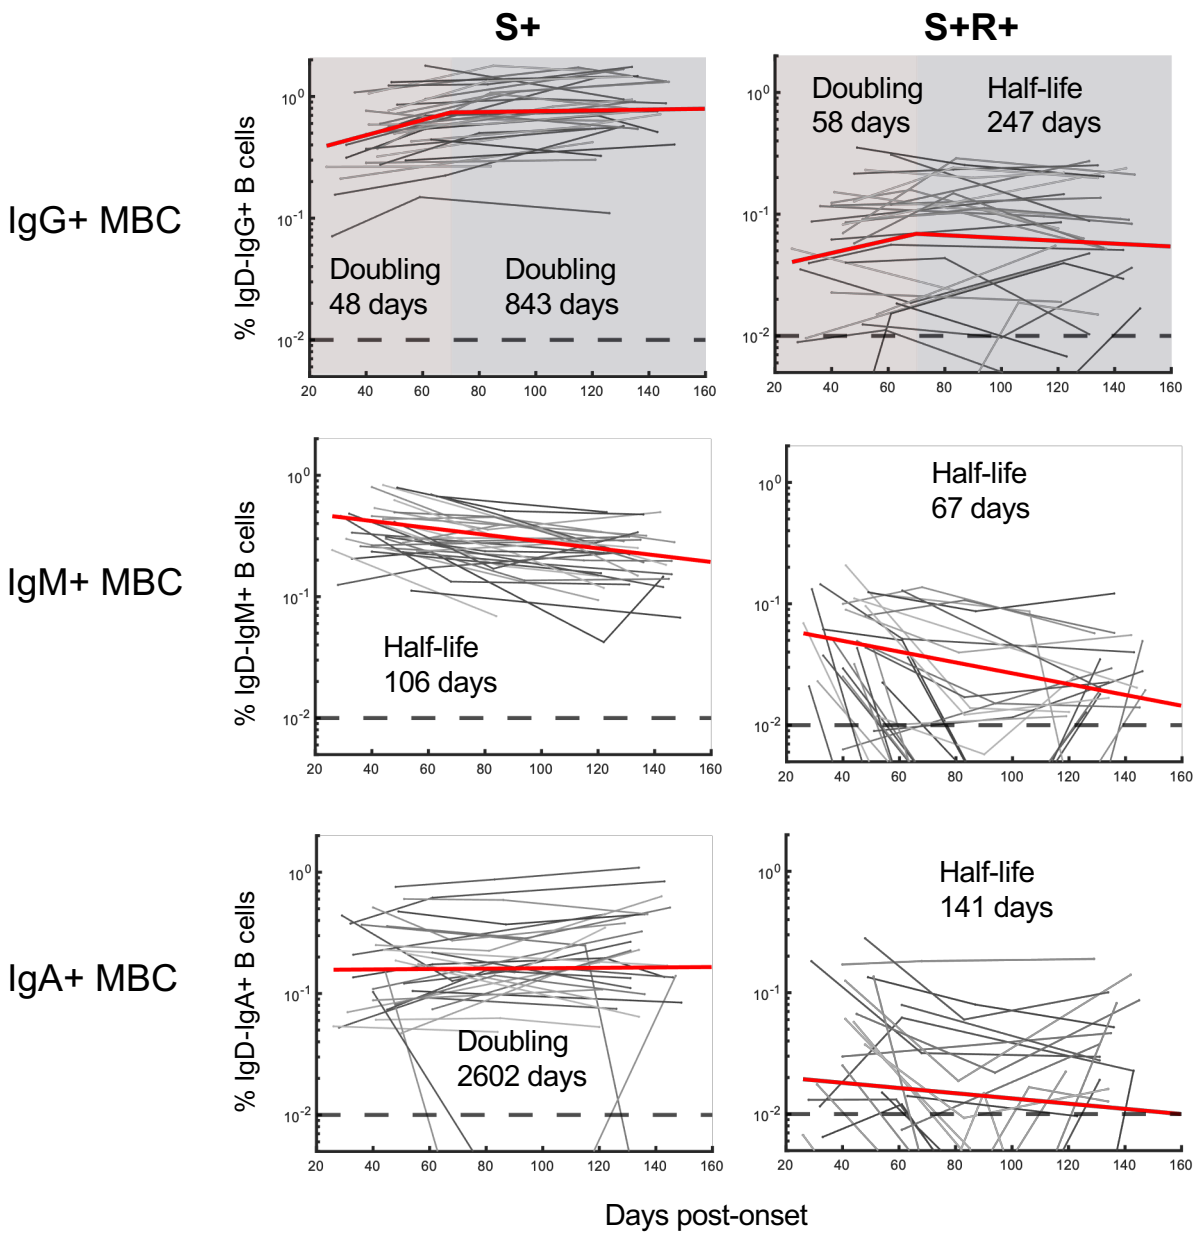

**Extended Data Figure 7: Fitting of the kinetics of S- and RBD-specific memory B cell responses over time.**

The best-fit half-lives are shown for the fitting of the growth and/or decay of S- or RBD-specific memory B cells (n=31 subjects). Two-phase decay is indicated by red (before day 70) and blue (after day 70) shaded areas. No shading indicates where a single-phase decay model was used to fit the data.

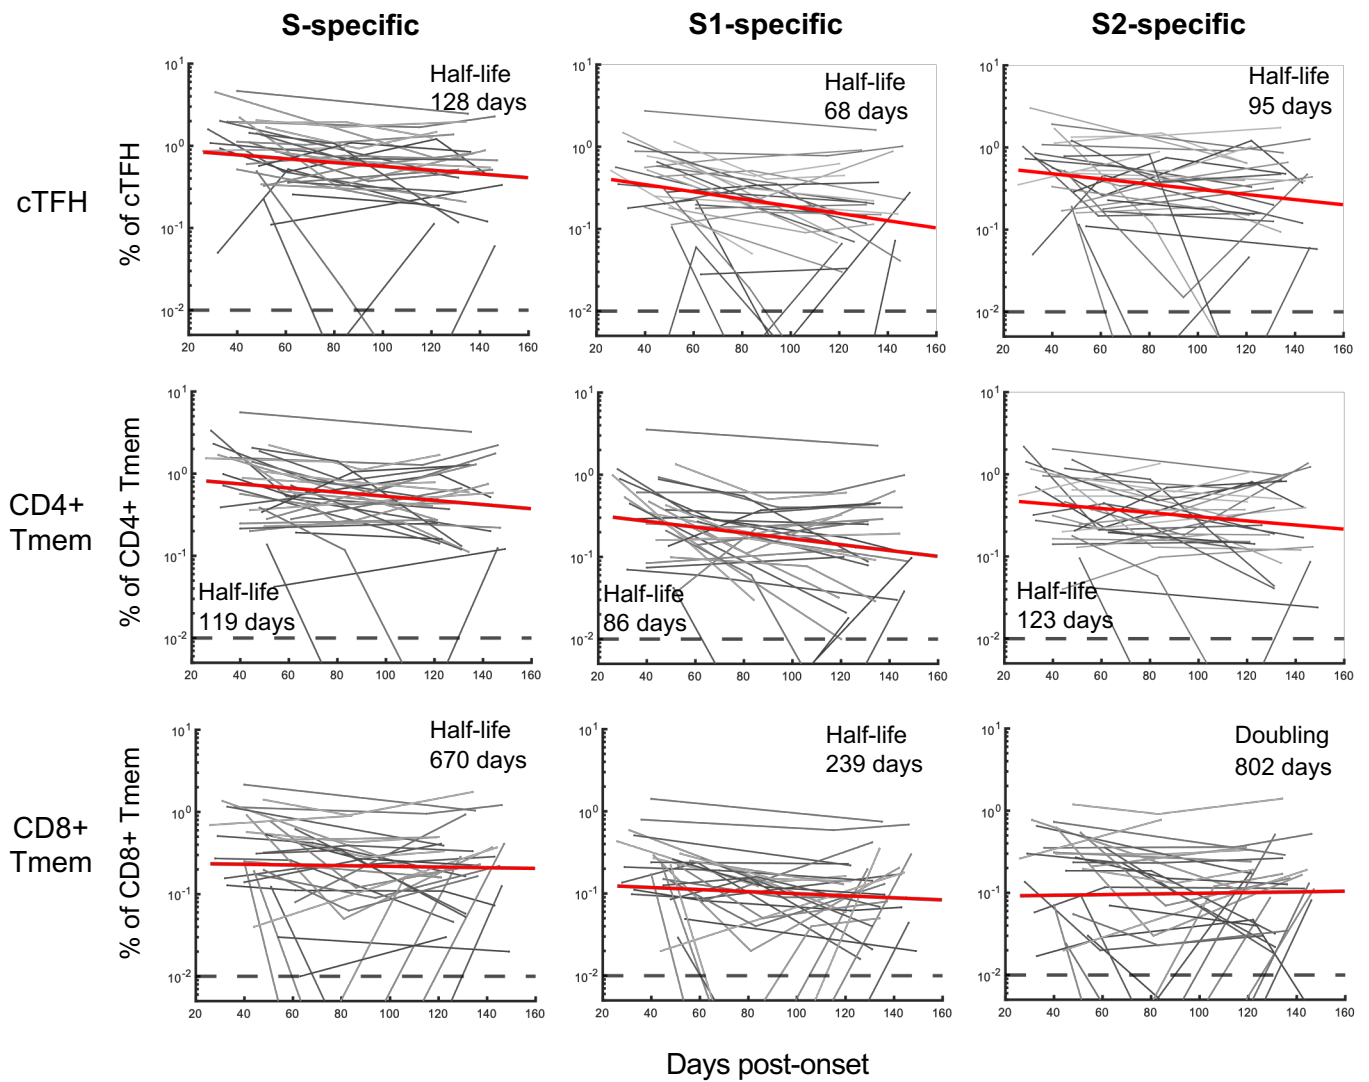

**Extended Data Figure 8: Fitting of the decline in SARS-CoV-2-specific T cells over time.**

The best-fit half-lives are shown for the fitting of the decay of cTFH, CD4+ Tmem and CD8+ Tmem specific to total S (S1+S2 responses combined), S1 or S2 peptide pools (n=31 subjects). In all cases decay was fit with a single-phase decay model with the half-lives shown.

**A**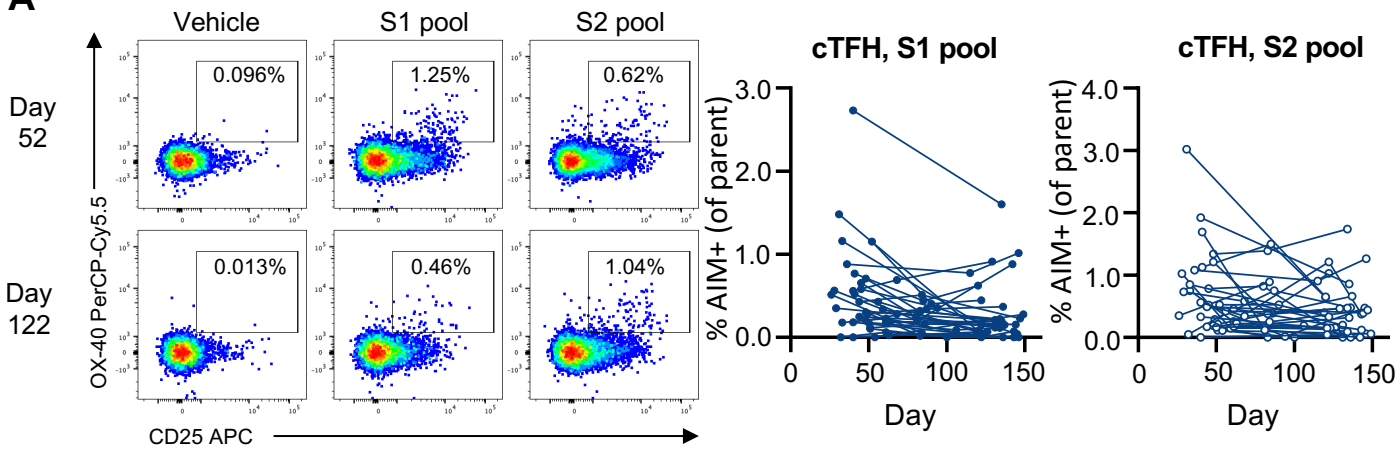**B**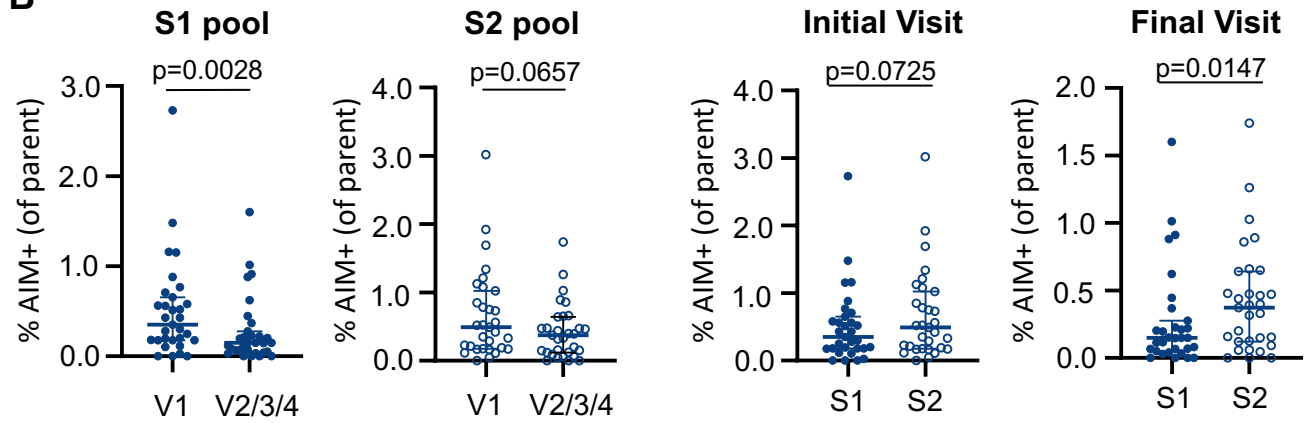**C**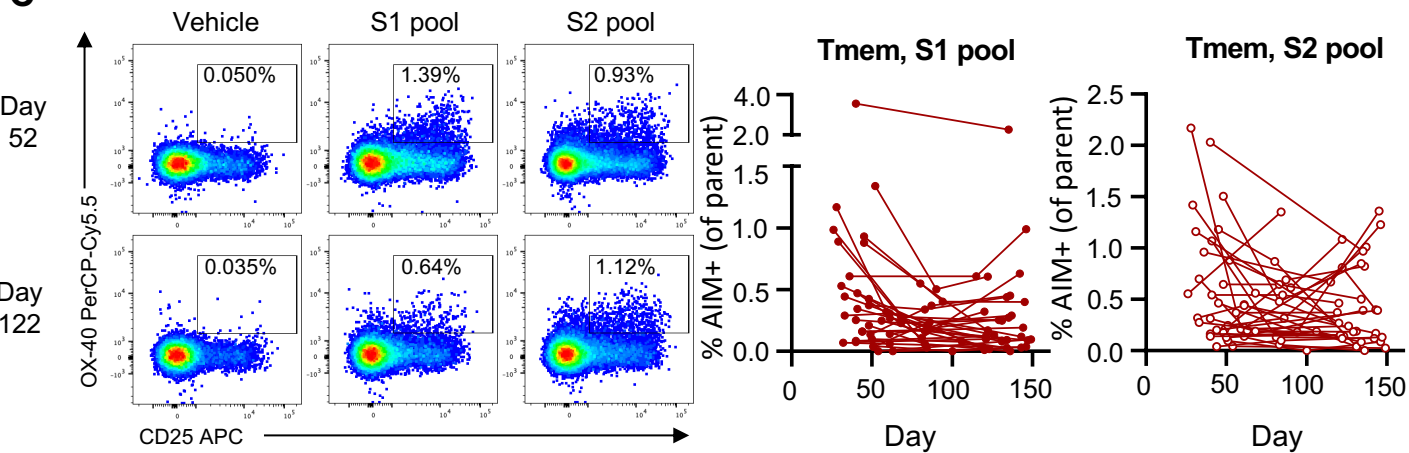**D**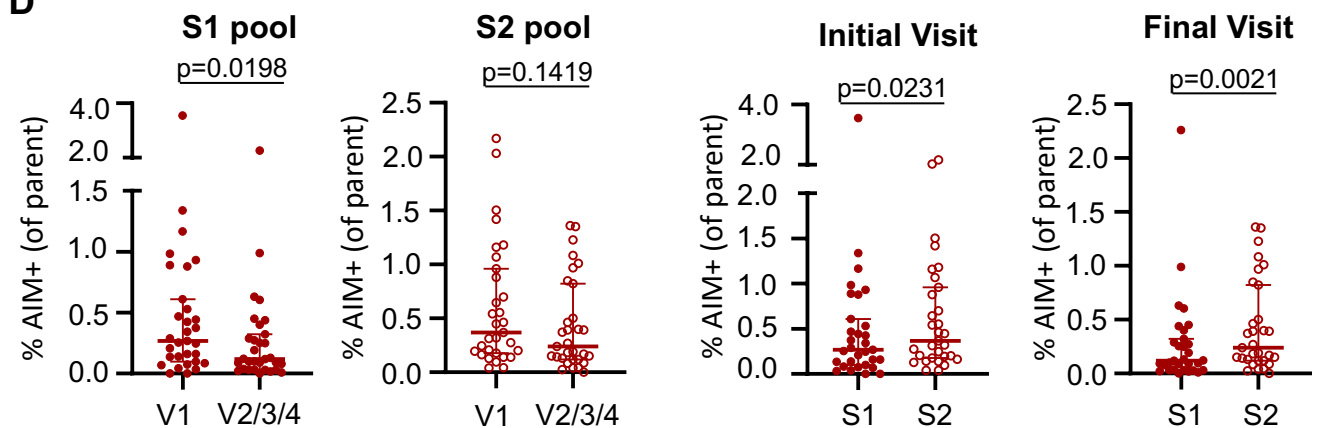



**Extended Data Figure 9: S1 and S2-specific CD4+ T cell responses.**

(**A, C**) Representative staining of AIM markers following S1 and S2 peptide pool stimulation among (**A**) cTFH (CD3+CD4+CD8-CD45RA-CXCR5+) or (**C**) CD4+ Tmem cells and longitudinal cohort analysis (n=31). (**B, D**) Comparison of S1 or S2-specific (**B**) cTFH or (**D**) CD4+ Tmem responses at the earliest and latest visit for each participant, as well as paired frequency of S1 versus S2 responses at the initial or final visit (n=31). Statistics assessed by two-tailed Wilcoxon test.

**A**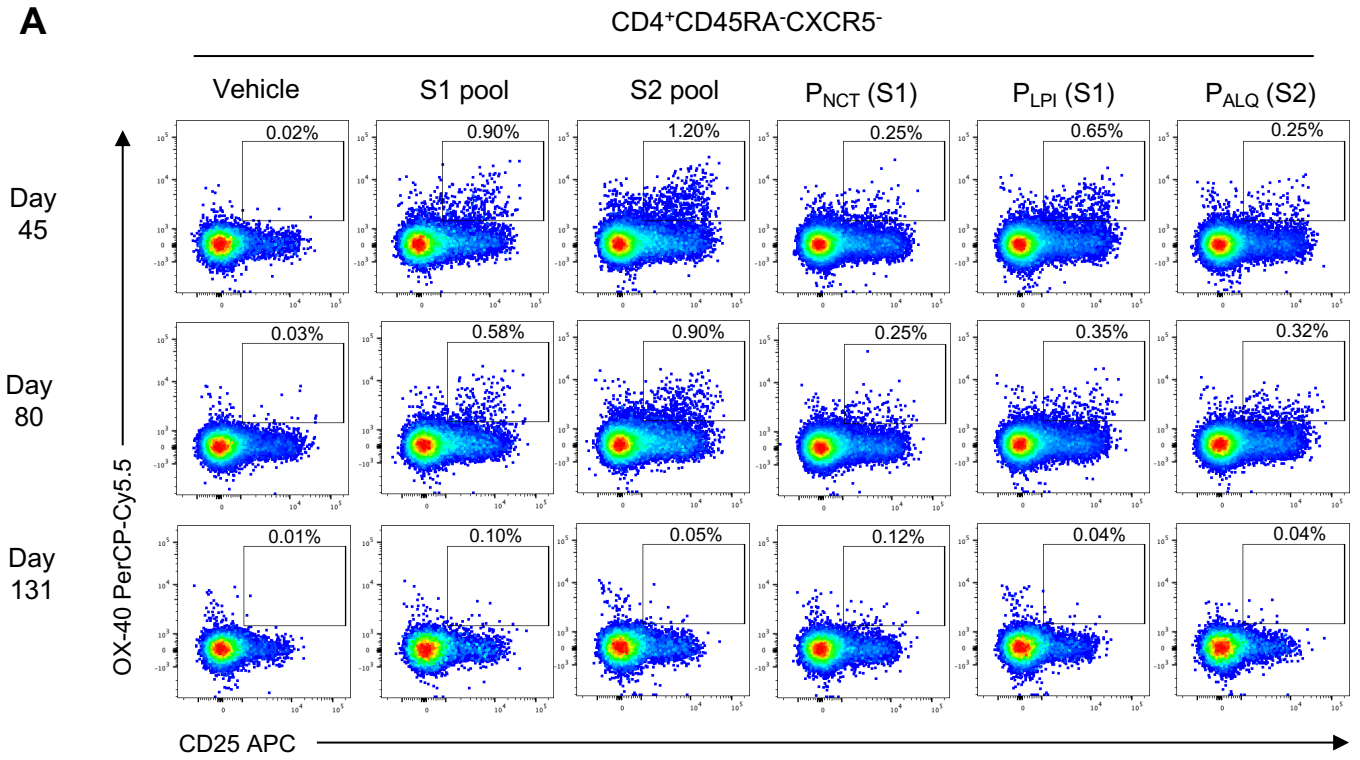**B**

### Longitudinal epitope-specific CD4<sup>+</sup> T cell responses

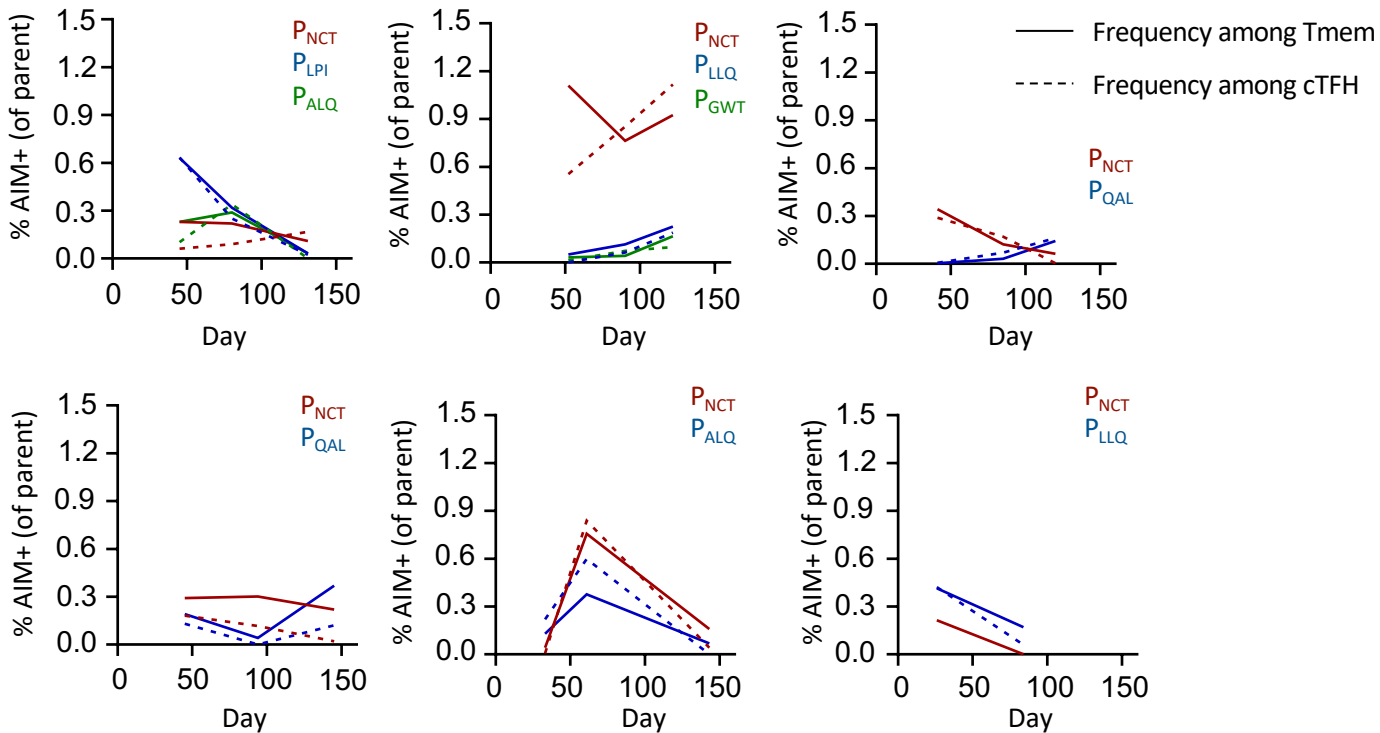**C**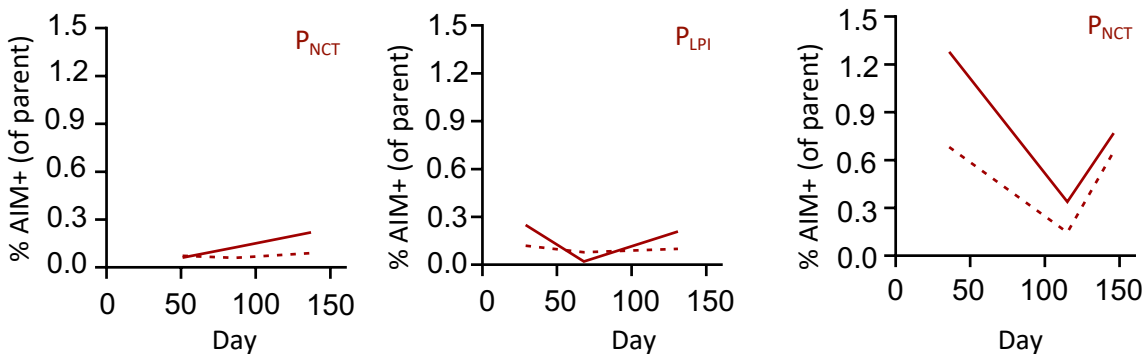

**Extended Data Figure 10: Epitope-specific CD4+ T cell responses.**

(A) Representative staining of AIM markers following S1 or S2 peptide pool or individual peptide stimulation among the CD4+ Tmem population. (B,C) Longitudinal peptide-specific frequencies in individual subjects (n=9; solid line, CD4+ Tmem; dashed line, cTFH) for whom (B) multiple or (C) single epitopes were identified.

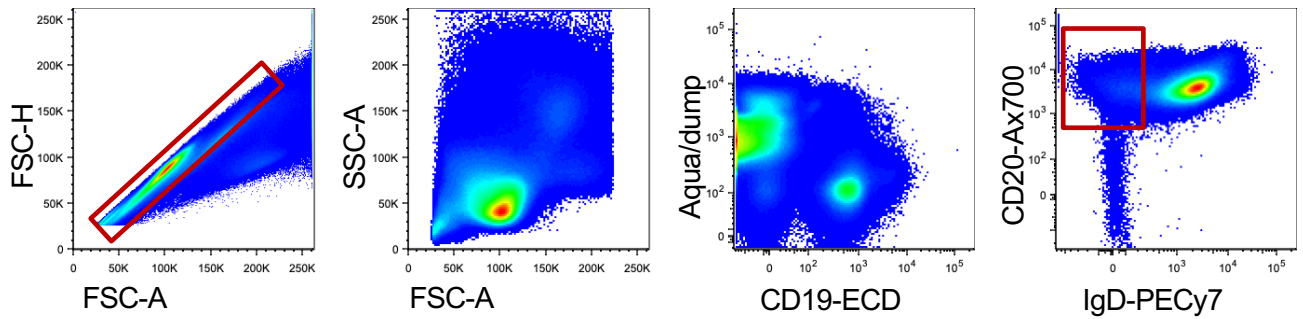

### Isotype staining

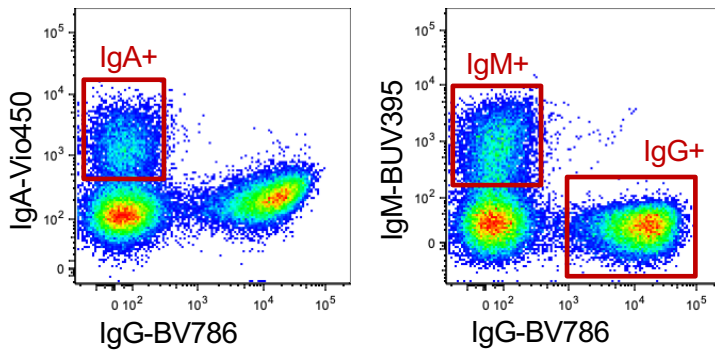

### CD21/27 staining

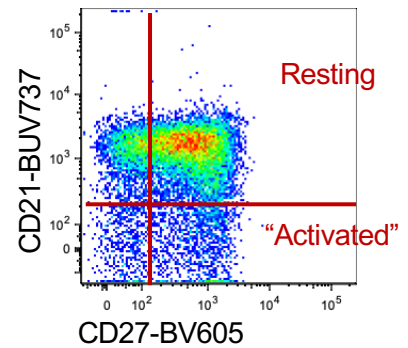

### Probe staining

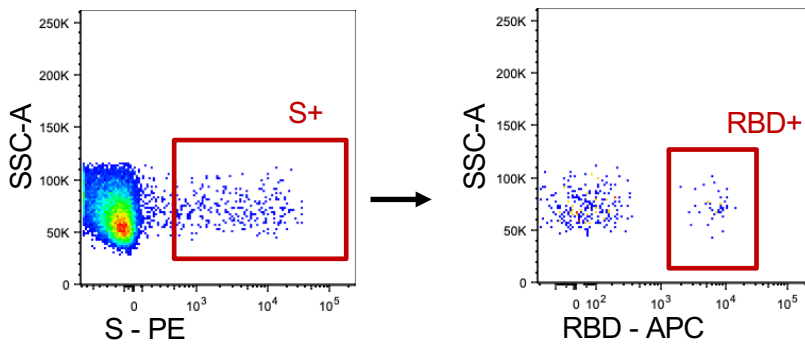

## Supplementary Fig. S1: Gating strategy for resolving antigen-specific B cells and surface isotypes.

After doublet exclusion (FSC-A vs FSC-H) and lymphocyte gating (FSC-A vs SSC-A), live CD19+IgD-CD20+ B cells were gated based on surface immunoglobulin expression (IgM, IgG, IgA). Binding to SARS-CoV-2 spike (S) and/or SARS-CoV-2 RBD probes was assessed for each population. Memory B cell phenotypes were identified by CD21 and CD27 co-staining.

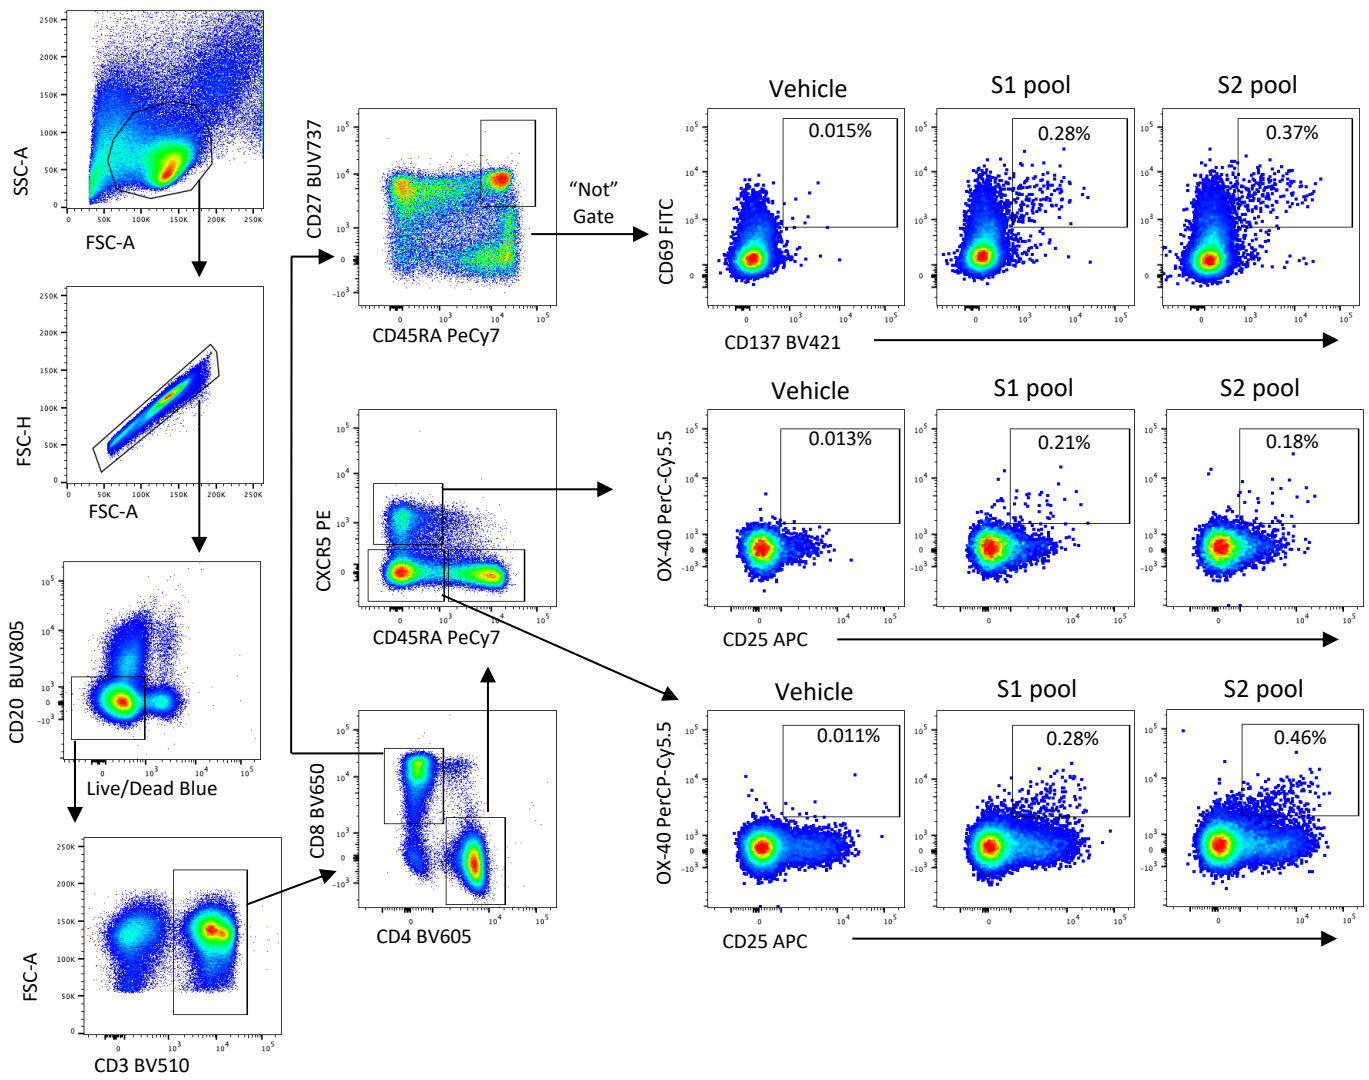

**Supplementary Fig. S2: Gating strategy for quantifying antigen-specific T cells.** Lymphocytes were identified by FSC/SSC, followed by doublet exclusion (FSC-A vs FSC-H), and exclusion of dead or CD20+ cells. After gating on CD3, single positive CD4 or CD8 T cell subsets were identified. CD8 Tmem were gated as non-naïve (CD27+CD45RA+) cells, and assessed for co-expression of CD69 and CD137 following stimulation. CD4 T cells were gated as cTFH (CXCR5+CD45RA-) or Tmem (CXCR5-CD45RA-), and assessed for co-expression of OX-40 and CD25 following stimulation.

**Pep1** Intensity **KYFDSEKRCQMDVWGQGTIVYSSASTK**  $m/z = 1033.7998$  ( $z = 3$ )

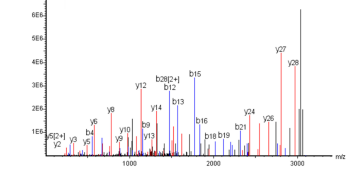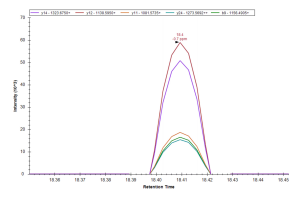

**Pep2** Intensity **KYFDSEK**  $m/z = 558.7517$  ( $z = 2$ )

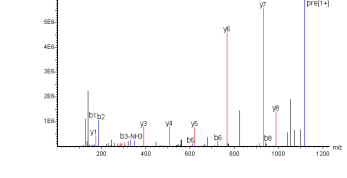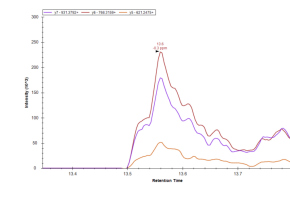

**Pep3** Intensity **DRVWYDSSGVSK**  $m/z = 547.5707$  ( $z = 3$ )

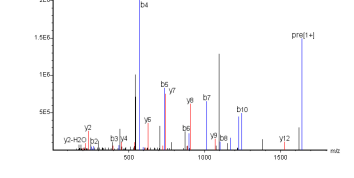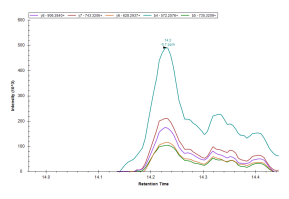

**Pep4** Intensity **GMVASGVNR**  $m/z = 517.72$  ( $z = 2$ )

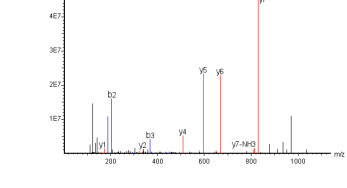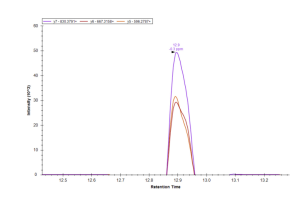

**Pep5** Intensity **GLYASGNFR**  $m/z = 492.7485$  ( $z = 2$ )

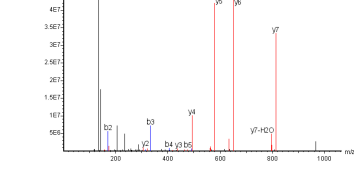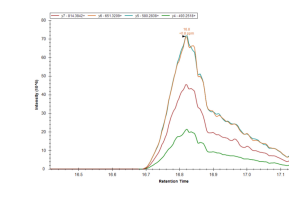

**Pep6** Intensity **GLYASGVNR**  $m/z = 487.2405$  ( $z = 2$ )

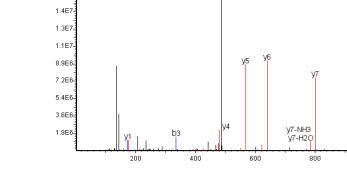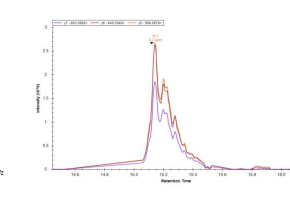

**Pep7** Intensity **VGAPIER**  $m/z = 371.2163$  ( $z = 2$ )

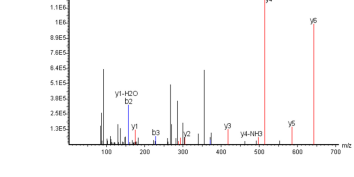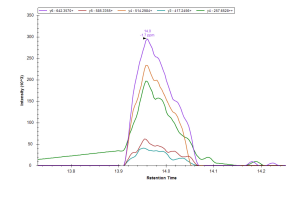

**Pep8** Intensity **GFVEVSSPTIK**  $m/z = 695.8481$  ( $z = 2$ )

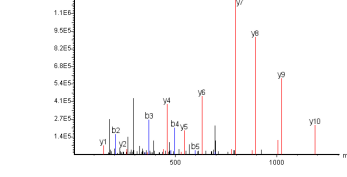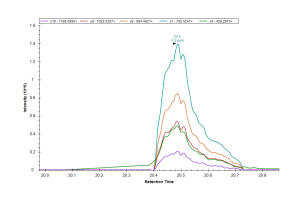

**Pep9** Intensity **YDVIWVGSYR**  $m/z = 654.2882$  ( $z = 2$ )

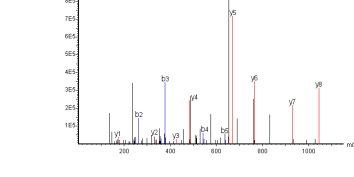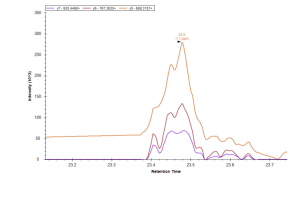

**Pep10** Intensity **GDDVSSGYK**  $m/z = 577.7355$  ( $z = 2$ )

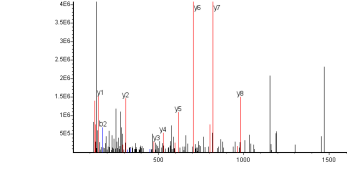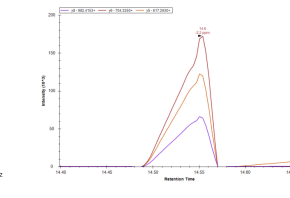

**Pep11** Intensity **YCSRGITL**  $m/z = 485.2448$  ( $z = 2$ )

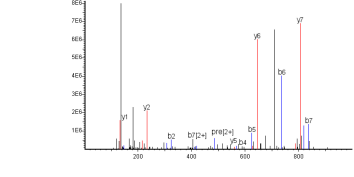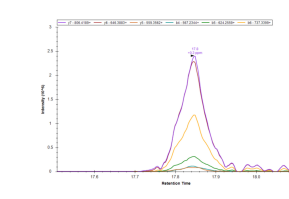

**Pep12** Intensity **GITLVGVNR**  $m/z = 521.3244$  ( $z = 2$ )

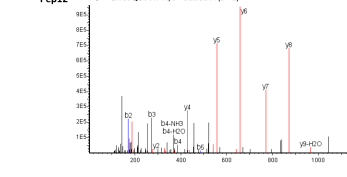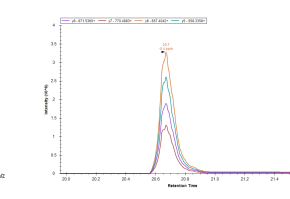

**Pep13** Intensity **GFTLVGVNR**  $m/z = 538.3166$  ( $z = 2$ )

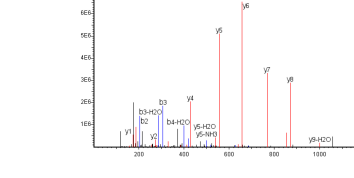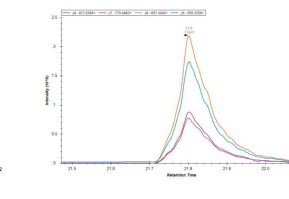

**Pep14** Intensity **VGGVVRAL**  $m/z = 421.2663$  ( $z = 2$ )

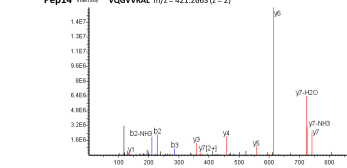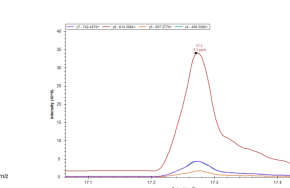

**Pep15** Intensity **ALRPGSKEYY**  $m/z = 395.2084$  ( $z = 3$ )

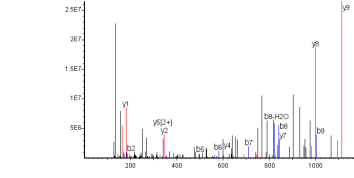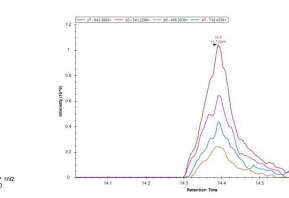

**Pep16** Intensity **TLVQGVNR**  $m/z = 436.2716$  ( $z = 2$ )

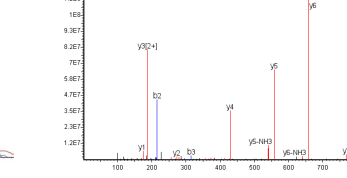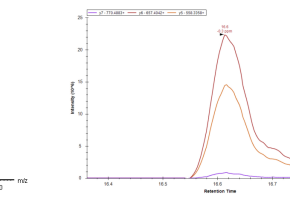

**Supplementary Fig. S3: Representative annotated MS/MS spectra (left panel) and their corresponding extracted ion chromatograms (XICs; right panel).** The peptides used in PRM analyses are the matched clonotypic CDR-H3 peptides (pep1-16). Underlined amino acid indicates a post translational modification: M (oxidised methionine), W (oxidised tryptophan), K (carbamidomethylated lysine), D (carbamidomethylated aspartate), C (carbamidomethylated cysteine), and Y (acetylated tyrosine). The sequences, m/z and z of each individual peptides are shown on the top of their annotated MS/MS spectra. Matched b ions are indicated in blue and y ions are in red. m=mass, z=charge.
